# Supplementary material for: Prognosis Relevance of Serum Cytokines in Pancreatic Cancer
Source: PubMed Central journal article supplement (PMC4539422; doi:10.1155/2015/518284), 2015-08-04
Supplement: 518284.f1.pdf [file 518284.f1.pdf]

**Supplementary material:**

**Supplementary Figure 1:** Leave-one-out cross-validation (LOOCV) analysis. A LOOCV was performed to estimate the predictive value of our five cytokines multivariate Cox model. For this analysis, a model was constructed using every sample (the training set) except one (the test set). The entire procedure was repeated until each case had been omitted once. In every iteration, one sample was left out and the multivariate Cox model was constructed by the rest of the samples using exactly the same process as our modeling procedure for feature selection and model construction. Subsequently, the test sample PI was obtained from the previously performed model. All constructed models are shown with their respective goodness of fit (R-squared measurements) ranging from 0.8 to 0.98.

**Supplementary Table 1:** Individualized clinicopathologic data of the 14 PDAC patients and their classification according to long and short survival.

**Supplementary Table 2:** Relation between the real and the estimated survival based on multivariate prognosis index for the 14 PDAC patients. The cytokine expression levels for the 5 cytokines involved in the multivariate prognosis model are shown. Long and short survivals are estimated from PI values taking into account the cut-off provided in Figure 3 (PI<17 for long survival and PI>17 for short survival).

**Supplementary Table 3:** Normalized data from antibody array for 507 human cytokines and 14 PDAC patients.

Supplementary Figure 1:

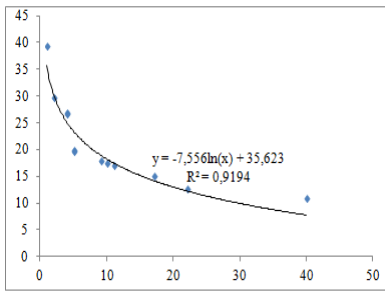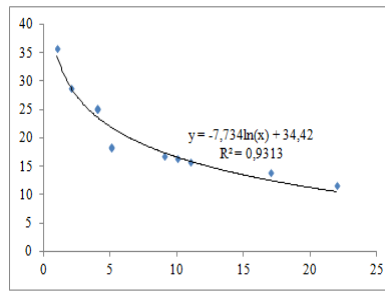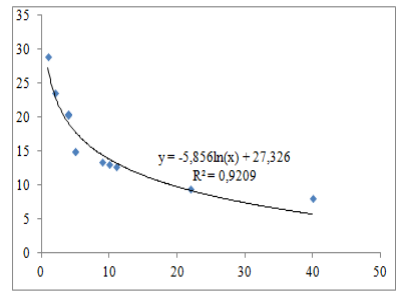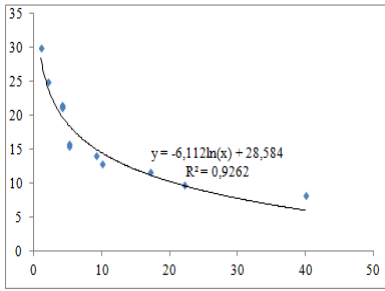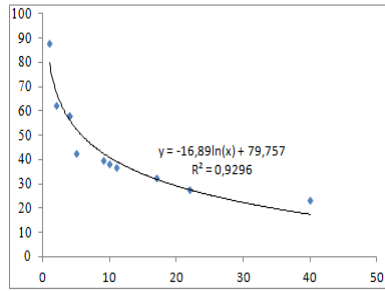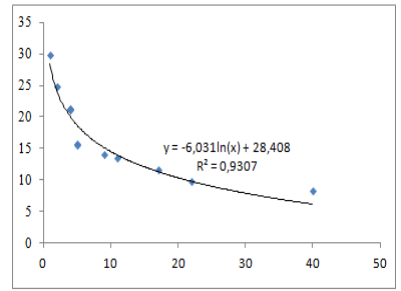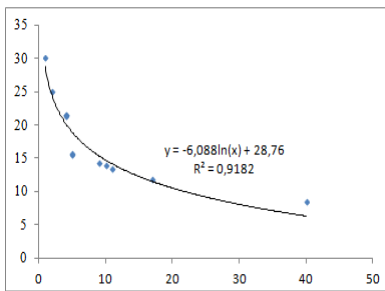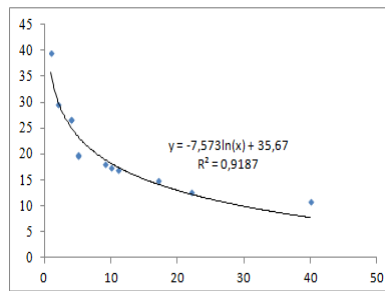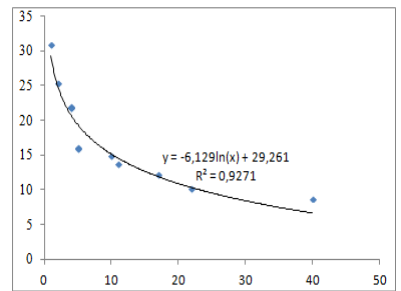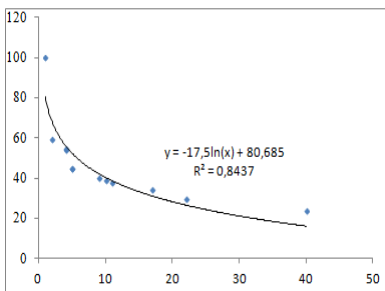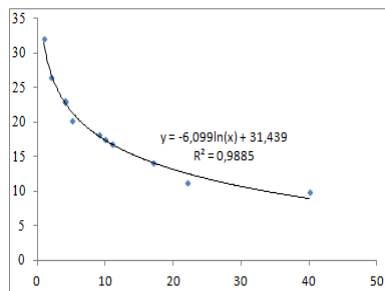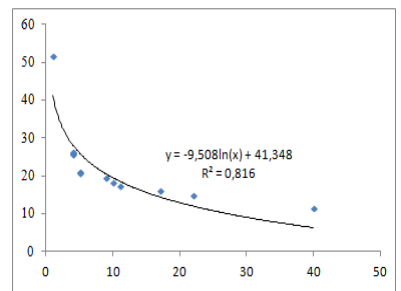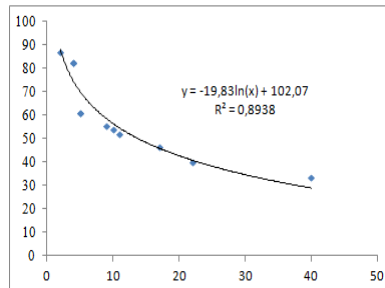

Supplementary Table 1:

| <i>Supplementary Table 1: Individualized clinicopathologic data.</i> |            |               |                       |                 |              |                     |                          |                      |                            |
|----------------------------------------------------------------------|------------|---------------|-----------------------|-----------------|--------------|---------------------|--------------------------|----------------------|----------------------------|
|                                                                      | <i>Age</i> | <i>Gender</i> | <i>Disease Status</i> | <i>Diabetes</i> | <i>Smoke</i> | <i>Chemotherapy</i> | <i>Clinical Response</i> | <i>Survival time</i> | <i>Long/Short Survival</i> |
| <i>P1</i>                                                            | 67         | Male          | III                   | Type II         | Yes          | Gem+Erl             | PD                       | 4                    | S                          |
| <i>P2</i>                                                            | 41         | Male          | IV                    | No              | No           | Gem+Erl             | SD                       | 40                   | L                          |
| <i>P3</i>                                                            | 62         | Male          | IV                    | No              | No           | Gem+Erl             | PR                       | 17                   | L                          |
| <i>P4</i>                                                            | 72         | Female        | IV                    | Type II         | No           | Gem+Erl             | PD                       | 11                   | L                          |
| <i>P5</i>                                                            | 55         | Female        | IV                    | No              | No           | Gem+Erl             | PD                       | 5                    | S                          |
| <i>P6</i>                                                            | 78         | Female        | III                   | No              | No           | Gem+Erl             | SD                       | 37                   | L                          |
| <i>P7</i>                                                            | 57         | Male          | IV                    | Type II         | Yes          | Gem+Erl             | PD                       | 15                   | L                          |
| <i>P8</i>                                                            | 60         | Male          | IV                    | No              | Yes          | Gem+Erl             | PR                       | 22                   | L                          |
| <i>P9</i>                                                            | 79         | Male          | IV                    | No              | No           | Gem+Erl             | PD                       | 4                    | S                          |
| <i>P10</i>                                                           | 71         | Female        | III                   | No              | No           | Gem+Erl             | PD                       | 9                    | L                          |
| <i>P11</i>                                                           | 78         | Female        | III                   | No              | No           | Gem+Erl             | PD                       | 4                    | S                          |
| <i>P12</i>                                                           | 61         | Female        | IV                    | Type II         | No           | Gem+Erl             | SD                       | 5                    | S                          |
| <i>P13</i>                                                           | 70         | Male          | IV                    | Type II         | Yes          | Gem+Erl             | PD                       | 2                    | S                          |
| <i>P14</i>                                                           | 70         | Female        | IV                    | Type II         | No           | Gem+Erl             | PD                       | 1                    | S                          |

*PR: partial response; SD: stable disease; PD: progressive disease; S: short survival; L: long survival*

Supplementary Table 2:

| <i>Supplementary Table 2: Real vs Estimated survival based on multivariate prognosis index</i> |               |              |                 |        |         |             |                         |                     |                    |      |
|------------------------------------------------------------------------------------------------|---------------|--------------|-----------------|--------|---------|-------------|-------------------------|---------------------|--------------------|------|
|                                                                                                | Real Survival |              | Cytokine Levels |        |         |             |                         | Estimated Prognosis |                    | Goal |
|                                                                                                | Survival time | Long / Short | B7-1/CD80       | IL-29  | PD-ECGF | EG-VEGF/PK1 | NRG1-beta1 / HRG1-beta1 | Estimated PI        | Estimated survival |      |
| <b>P1</b>                                                                                      | 4             | S            | 4.55            | 27.28  | 1.24    | 632.39      | 19.43                   | 24.37               | S                  | ✓    |
| <b>P2</b>                                                                                      | 40            | L            | 1.21            | 2.82   | 5.23    | 869.68      | 28.16                   | 9.71                | L                  | ✓    |
| <b>P3</b>                                                                                      | 17            | L            | 0.75            | 30.14  | 11.05   | 1643.14     | 30.65                   | 13.53               | L                  | ✓    |
| <b>P4</b>                                                                                      | 11            | L            | 0.81            | 33.22  | 4.05    | 3033.63     | 9.18                    | 15.39               | L                  | ✓    |
| <b>P5</b>                                                                                      | 5             | S            | 0.91            | 22.77  | 2.73    | 4348.38     | 5.77                    | 18.00               | S                  | ✓    |
| <b>P6</b>                                                                                      | 37            | L            | 1.26            | 1.26   | 6.74    | 2690.59     | 1.26                    | 14.44               | L                  | ✓    |
| <b>P7</b>                                                                                      | 15            | L            | 1.08            | 9.4    | 10.12   | 1730.97     | 160.81                  | 15.87               | L                  | ✓    |
| <b>P8</b>                                                                                      | 22            | L            | 0.89            | 12.82  | 14.31   | 846.04      | 24.45                   | 11.39               | L                  | ✓    |
| <b>P9</b>                                                                                      | 4             | S            | 4.51            | 20.05  | 5.51    | 308.34      | 36.1                    | 24.23               | S                  | ✓    |
| <b>P10</b>                                                                                     | 9             | L            | 1.28            | 1.28   | 1.28    | 3770.85     | 21.78                   | 16.30               | L                  | ✓    |
| <b>P11</b>                                                                                     | 4             | S            | 1.22            | 137.51 | 26.53   | 279.89      | 9.76                    | 24.36               | S                  | ✓    |
| <b>P12</b>                                                                                     | 5             | S            | 1.27            | 73.79  | 23.19   | 14.34       | 5.9                     | 17.77               | S                  | ✓    |
| <b>P13</b>                                                                                     | 2             | S            | 1.05            | 277.23 | 1.05    | 142.83      | 2.81                    | 27.68               | S                  | ✓    |
| <b>P14</b>                                                                                     | 1             | S            | 1.52            | 60.8   | 86.04   | 169.34      | 13.98                   | 34.99               | S                  | ✓    |

*S: short survival; L: long survival; PI: prognosis index*

Supplementary Table 3:

| <b>Cytokine Name</b>            | <b>P1</b> | <b>P2</b> | <b>P3</b> | <b>P4</b> | <b>P5</b> | <b>P6</b> | <b>P7</b> | <b>P8</b> | <b>P9</b> | <b>P10</b> | <b>P11</b> | <b>P12</b> | <b>P13</b> | <b>P14</b> |
|---------------------------------|-----------|-----------|-----------|-----------|-----------|-----------|-----------|-----------|-----------|------------|------------|------------|------------|------------|
| <b>6Ckine</b>                   | 22.73     | 20.52     | 0.75      | 5.13      | 0.91      | 1.26      | 1.08      | 9.54      | 1.50      | 1.28       | 184.15     | 159.81     | 7.72       | 126.77     |
| <b>Activin A</b>                | 31.83     | 37.41     | 0.75      | 0.81      | 0.91      | 1.26      | 1.08      | 11.93     | 1.50      | 1.28       | 28.66      | 8.43       | 1.05       | 13.98      |
| <b>Activin B</b>                | 4.55      | 39.02     | 0.75      | 0.81      | 0.91      | 1.26      | 1.08      | 22.96     | 186.51    | 1.28       | 31.40      | 11.81      | 3.16       | 19.15      |
| <b>Activin C</b>                | 2.89      | 25.74     | 8.79      | 0.81      | 0.91      | 1.26      | 1.08      | 16.70     | 1.50      | 1.28       | 7.62       | 4.22       | 7.72       | 13.38      |
| <b>Activin RIA / ALK-2</b>      | 1.65      | 26.95     | 10.30     | 1.89      | 0.91      | 1.26      | 1.08      | 30.12     | 31.59     | 2.14       | 59.45      | 124.39     | 3.51       | 54.72      |
| <b>Activin RIB / ALK-4</b>      | 12.81     | 15.29     | 12.06     | 9.72      | 31.27     | 16.84     | 1.08      | 17.59     | 268.73    | 16.65      | 16.46      | 7.17       | 1.05       | 7.30       |
| <b>Activin RII A/B</b>          | 14.47     | 16.49     | 11.81     | 9.99      | 36.43     | 13.47     | 1.08      | 7.16      | 21.06     | 14.52      | 7.62       | 8.01       | 1.05       | 7.60       |
| <b>Activin RIIA</b>             | 269.49    | 276.35    | 356.21    | 300.07    | 261.68    | 332.22    | 81.31     | 115.41    | 311.85    | 182.35     | 26.53      | 188.06     | 435.50     | 80.56      |
| <b>Adiponectin / Acrp30</b>     | 390.18    | 113.03    | 15.32     | 100.47    | 68.30     | 123.37    | 53.12     | 268.40    | 280.26    | 251.11     | 154.89     | 88.55      | 23.86      | 200.04     |
| <b>AgRP</b>                     | 14.47     | 18.50     | 2.51      | 13.23     | 10.02     | 1.26      | 1.08      | 13.42     | 514.39    | 14.09      | 86.89      | 17.29      | 1.05       | 16.11      |
| <b>ALCAM</b>                    | 9.09      | 22.93     | 0.75      | 14.58     | 11.54     | 1.26      | 1.08      | 5.96      | 22.06     | 17.94      | 3.05       | 1.27       | 1.05       | 3.34       |
| <b>Angiogenin</b>               | 18.60     | 21.72     | 18.84     | 19.99     | 17.30     | 7.16      | 1.08      | 21.77     | 24.07     | 14.09      | 40.55      | 4.22       | 1.05       | 24.32      |
| <b>Angiopoietin-1</b>           | 45.05     | 28.56     | 34.67     | 34.84     | 29.14     | 2.11      | 1.08      | 39.36     | 104.28    | 37.58      | 178.06     | 107.95     | 50.88      | 114.92     |
| <b>Angiopoietin-2</b>           | 69.44     | 50.68     | 132.64    | 105.33    | 131.75    | 1.26      | 16.62     | 51.00     | 157.93    | 73.03      | 2200.10    | 1749.50    | 364.26     | 1883.68    |
| <b>Angiopoietin-4</b>           | 35.13     | 32.18     | 49.74     | 0.81      | 0.91      | 1.26      | 78.06     | 8.65      | 21.56     | 7.26       | 41.16      | 12.65      | 1.05       | 29.49      |
| <b>Angiopoietin-like 1</b>      | 2685.80   | 2937.27   | 2502.51   | 4582.86   | 0.91      | 3142.81   | 2081.50   | 0.89      | 5800.22   | 2956.04    | 3631.87    | 3017.46    | 2587.71    | 2900.62    |
| <b>Angiopoietin-like 2</b>      | 40.09     | 29.36     | 117.31    | 0.81      | 0.91      | 8.42      | 48.42     | 0.89      | 1.50      | 1.28       | 117.99     | 77.17      | 11.58      | 91.20      |
| <b>Angiopoietin-like Factor</b> | 22.73     | 1.21      | 0.75      | 0.81      | 0.91      | 1.26      | 16.98     | 0.89      | 1.50      | 2.14       | 15.85      | 10.54      | 1.05       | 12.46      |
| <b>Angiostatin</b>              | 5276.54   | 1.21      | 0.75      | 748.41    | 0.91      | 668.65    | 1770.00   | 314.62    | 1.50      | 1.28       | 3358.99    | 2639.22    | 1431.07    | 3134.10    |
| <b>APJ</b>                      | 5.79      | 1.21      | 0.75      | 0.81      | 2.13      | 2984.92   | 1.08      | 1446.95   | 10331.00  | 1926.42    | 0.91       | 1.27       | 1.05       | 5.47       |
| <b>AR (Amphiregulin)</b>        | 1.24      | 25.34     | 10.80     | 0.81      | 16.09     | 1.26      | 57.82     | 7.16      | 8.52      | 14.95      | 25.92      | 4.64       | 1.05       | 11.55      |
| <b>APRIL</b>                    | 1.24      | 1177.80   | 1241.46   | 1432.28   | 718.25    | 520.01    | 432.56    | 339.67    | 5596.67   | 1621.08    | 542.71     | 356.31     | 1206.83    | 212.81     |
| <b>Artemin</b>                  | 1.24      | 40.63     | 0.75      | 0.81      | 0.91      | 1.26      | 86.37     | 36.38     | 12.53     | 81.99      | 16.77      | 2.53       | 1.05       | 11.86      |
| <b>Axl</b>                      | 5.37      | 77.64     | 0.75      | 0.81      | 0.91      | 1.26      | 1.08      | 0.89      | 1.50      | 1.28       | 14.94      | 1.27       | 1.05       | 8.21       |

|                               |        |        |       |        |        |        |        |        |        |        |        |        |        |        |
|-------------------------------|--------|--------|-------|--------|--------|--------|--------|--------|--------|--------|--------|--------|--------|--------|
| <b>B7-1 / CD80</b>            | 4.55   | 1.21   | 0.75  | 0.81   | 0.91   | 1.26   | 1.08   | 0.89   | 4.51   | 1.28   | 1.22   | 1.27   | 1.05   | 1.52   |
| <b>BAFF R / TNFRSF13C</b>     | 46.71  | 20.52  | 0.75  | 0.81   | 0.91   | 7.16   | 1.08   | 9.24   | 1.50   | 1.28   | 9.45   | 9.28   | 1.05   | 16.11  |
| <b>BCMA / TNFRSF17</b>        | 38.44  | 20.11  | 11.05 | 11.07  | 16.39  | 21.90  | 1.08   | 22.96  | 4.01   | 14.09  | 5.49   | 5.90   | 1.05   | 2.74   |
| <b>BD-1</b>                   | 39.68  | 16.89  | 18.34 | 19.72  | 11.23  | 21.05  | 1.08   | 36.08  | 36.10  | 22.63  | 28.05  | 13.49  | 8.07   | 16.42  |
| <b>BDNF</b>                   | 52.08  | 53.90  | 72.10 | 46.46  | 69.52  | 58.95  | 6.50   | 54.28  | 89.74  | 74.73  | 193.30 | 291.79 | 628.15 | 124.95 |
| <b>beta-Catenin</b>           | 1.24   | 7.24   | 5.02  | 8.37   | 3.95   | 1.26   | 1.08   | 19.38  | 1.50   | 1.28   | 1.83   | 1.27   | 1.05   | 1.22   |
| <b>beta-Defensin 2</b>        | 1.24   | 16.49  | 11.05 | 0.81   | 0.91   | 1.26   | 1.08   | 34.00  | 1.50   | 1.28   | 1.22   | 1.27   | 1.05   | 0.91   |
| <b>beta-NGF</b>               | 1.24   | 43.44  | 12.06 | 0.81   | 0.91   | 1.26   | 1.08   | 31.01  | 6.02   | 1.28   | 41.16  | 36.26  | 1.40   | 27.97  |
| <b>BIK</b>                    | 1.24   | 15.29  | 0.75  | 0.81   | 0.91   | 1.26   | 1.08   | 9.54   | 20.05  | 1.28   | 1.83   | 1.27   | 1.05   | 0.91   |
| <b>BLC / BCA-1 / CXCL13</b>   | 1.24   | 30.97  | 12.31 | 0.81   | 3.34   | 1.26   | 1.08   | 1.79   | 63.17  | 2.14   | 17.99  | 22.77  | 1.05   | 18.54  |
| <b>BMP-2</b>                  | 1.24   | 13.68  | 0.75  | 0.81   | 0.91   | 1.26   | 1.08   | 3.88   | 14.04  | 2.56   | 2.74   | 5.06   | 2.46   | 4.56   |
| <b>BMP-3</b>                  | 28.52  | 28.16  | 10.80 | 2.70   | 1.82   | 1.26   | 1.08   | 30.72  | 116.32 | 7.26   | 21.04  | 14.76  | 11.93  | 10.94  |
| <b>BMP-3b / GDF-10</b>        | 28.93  | 15.29  | 0.75  | 0.81   | 3.04   | 1.26   | 1.08   | 20.28  | 17.55  | 1.28   | 24.09  | 39.22  | 1.05   | 17.33  |
| <b>BMP-4</b>                  | 28.52  | 39.42  | 0.75  | 0.81   | 5.46   | 1.26   | 4.34   | 44.73  | 112.30 | 11.10  | 10.98  | 15.18  | 6.32   | 14.90  |
| <b>BMP-5</b>                  | 3.31   | 35.00  | 24.12 | 0.81   | 0.91   | 1.26   | 1.08   | 14.02  | 22.56  | 1.28   | 35.67  | 8.43   | 1.05   | 22.19  |
| <b>BMP-6</b>                  | 1.24   | 1.21   | 6.53  | 0.81   | 3.04   | 2.11   | 1.08   | 0.89   | 1.50   | 1.28   | 6.10   | 1.27   | 2.11   | 4.26   |
| <b>BMP-7</b>                  | 1.24   | 26.95  | 13.82 | 2.43   | 6.38   | 1.26   | 1.08   | 5.07   | 3.01   | 1.28   | 13.72  | 1.27   | 1.05   | 4.86   |
| <b>BMP-8</b>                  | 62.83  | 40.23  | 18.34 | 12.69  | 7.29   | 2.53   | 1.08   | 70.38  | 385.54 | 98.22  | 19.51  | 1.27   | 6.67   | 11.86  |
| <b>BMP-15</b>                 | 42.99  | 13.68  | 3.27  | 2.70   | 0.91   | 2.53   | 1.08   | 17.59  | 1.50   | 20.50  | 31.71  | 1.27   | 1.05   | 15.50  |
| <b>BMPR-IA / ALK-3</b>        | 25.21  | 13.27  | 5.28  | 3.51   | 2.13   | 5.47   | 1.08   | 17.30  | 2.51   | 15.37  | 25.00  | 1.27   | 1.05   | 15.50  |
| <b>BMPR-IB / ALK-6</b>        | 234.36 | 102.98 | 95.21 | 100.47 | 159.07 | 152.00 | 163.34 | 148.81 | 788.64 | 364.27 | 292.09 | 219.27 | 219.68 | 155.66 |
| <b>BMPR-II</b>                | 20.25  | 14.48  | 14.07 | 11.34  | 17.30  | 24.00  | 63.60  | 13.72  | 36.10  | 12.81  | 100.00 | 67.05  | 3.51   | 61.41  |
| <b>BTC</b>                    | 10.33  | 37.81  | 11.81 | 10.80  | 18.21  | 22.74  | 48.79  | 16.70  | 18.05  | 4.27   | 149.40 | 99.09  | 4.91   | 168.42 |
| <b>Cardiotrophin-1 / CT-1</b> | 2.48   | 32.18  | 13.06 | 3.78   | 0.91   | 1.26   | 1.08   | 1.79   | 4.01   | 2.14   | 90.25  | 89.82  | 1.05   | 67.49  |
| <b>CCL14 / HCC-1 / HCC-3</b>  | 1.24   | 27.76  | 3.01  | 0.81   | 0.91   | 1.26   | 1.08   | 0.89   | 1.50   | 2.14   | 100.61 | 35.00  | 1.05   | 66.28  |
| <b>CCL28 / VIC</b>            | 1.24   | 30.57  | 3.77  | 2.97   | 1.52   | 5.47   | 1.08   | 11.93  | 1.50   | 1.28   | 60.37  | 42.59  | 1.05   | 46.51  |
| <b>CCR1</b>                   | 27.69  | 1.21   | 10.05 | 0.81   | 0.91   | 1.26   | 1.08   | 45.93  | 195.53 | 1.71   | 91.16  | 44.70  | 3.86   | 35.87  |

|                                               |         |         |        |        |        |        |        |        |         |        |        |        |        |        |
|-----------------------------------------------|---------|---------|--------|--------|--------|--------|--------|--------|---------|--------|--------|--------|--------|--------|
| <b>CCR2</b>                                   | 10.33   | 5.23    | 5.02   | 2.16   | 0.91   | 2.11   | 1.08   | 5.96   | 35.60   | 1.28   | 42.38  | 49.76  | 6.67   | 28.88  |
| <b>CCR3</b>                                   | 11.16   | 4.42    | 2.26   | 3.24   | 0.91   | 5.89   | 1.08   | 45.03  | 48.63   | 1.28   | 28.05  | 5.48   | 1.05   | 11.55  |
| <b>CCR4</b>                                   | 39.27   | 24.54   | 13.31  | 2.97   | 6.38   | 8.42   | 1.08   | 0.89   | 283.27  | 5.55   | 19.21  | 15.18  | 13.69  | 17.02  |
| <b>CCR5</b>                                   | 12.40   | 28.96   | 13.31  | 1.35   | 6.68   | 1.26   | 1.08   | 2.68   | 13.04   | 1.28   | 14.94  | 15.18  | 2.11   | 9.42   |
| <b>CCR6</b>                                   | 19.43   | 12.07   | 9.80   | 0.81   | 7.59   | 1.26   | 1.08   | 2.68   | 21.06   | 1.28   | 7.62   | 7.59   | 5.97   | 7.60   |
| <b>CCR7</b>                                   | 1388.78 | 1513.28 | 405.70 | 169.35 | 286.57 | 554.54 | 622.64 | 691.27 | 582.58  | 257.94 | 84.46  | 358.42 | 808.18 | 179.07 |
| <b>CCR8</b>                                   | 100.85  | 84.07   | 22.86  | 17.02  | 85.00  | 29.47  | 1.08   | 51.29  | 46.63   | 26.05  | 14.63  | 54.40  | 86.68  | 31.92  |
| <b>CCR9</b>                                   | 390.59  | 808.94  | 202.47 | 55.10  | 237.09 | 268.64 | 185.38 | 201.30 | 449.22  | 92.67  | 40.25  | 296.85 | 404.97 | 147.75 |
| <b>CD14</b>                                   | 1.24    | 15.69   | 6.28   | 13.50  | 36.13  | 1.26   | 1.08   | 2.09   | 9.53    | 1.28   | 11.28  | 8.86   | 1.40   | 6.99   |
| <b>CD27 / TNFRSF7</b>                         | 1.24    | 1.21    | 2.51   | 15.40  | 15.18  | 1.26   | 1.08   | 6.26   | 66.68   | 4.27   | 68.91  | 25.72  | 1.05   | 21.89  |
| <b>CD30 / TNFRSF8</b>                         | 1.24    | 1.61    | 2.01   | 3.78   | 11.84  | 1.26   | 1.08   | 0.89   | 53.14   | 1.28   | 2.74   | 1.69   | 1.05   | 1.82   |
| <b>CD30 Ligand / TNFSF8</b>                   | 16.95   | 17.70   | 10.55  | 10.80  | 32.48  | 4.63   | 1.08   | 32.80  | 67.18   | 21.35  | 6.10   | 1.27   | 1.05   | 4.56   |
| <b>CD40 / TNFRSF5</b>                         | 14.88   | 5.63    | 8.29   | 9.45   | 10.32  | 14.32  | 1.08   | 4.18   | 108.79  | 12.38  | 19.51  | 5.06   | 1.05   | 11.86  |
| <b>CD40 Ligand / TNFSF5 /CD154</b>            | 125.24  | 179.81  | 66.82  | 55.10  | 55.86  | 94.74  | 17.71  | 60.54  | 139.88  | 41.42  | 86.89  | 25.30  | 38.25  | 56.85  |
| <b>CD 163</b>                                 | 1.24    | 4.42    | 8.79   | 11.07  | 3.04   | 17.26  | 1.08   | 3.58   | 26.57   | 3.84   | 18.90  | 10.54  | 3.86   | 14.29  |
| <b>Cerberus 1</b>                             | 1.24    | 1.21    | 1.26   | 7.56   | 3.95   | 13.47  | 1.08   | 3.58   | 37.10   | 7.26   | 2.13   | 1.27   | 1.05   | 0.91   |
| <b>Chem R23</b>                               | 1.24    | 1.21    | 1.51   | 35.11  | 0.91   | 56.84  | 1.08   | 0.89   | 48.63   | 2.56   | 5.49   | 3.80   | 2.81   | 4.56   |
| <b>Chordin-Like 1</b>                         | 11.99   | 13.27   | 11.56  | 15.67  | 0.91   | 16.00  | 1.08   | 0.89   | 157.43  | 11.10  | 75.92  | 48.07  | 1.05   | 22.19  |
| <b>Chordin-Like 2</b>                         | 95.48   | 34.59   | 62.55  | 55.10  | 16.09  | 68.21  | 1.08   | 10.44  | 56.65   | 23.91  | 90.25  | 137.46 | 65.97  | 56.55  |
| <b>Csk</b>                                    | 11.57   | 10.86   | 12.31  | 10.53  | 0.91   | 18.53  | 1.08   | 0.89   | 20.05   | 16.65  | 21.34  | 1.27   | 1.05   | 8.51   |
| <b>CLC</b>                                    | 41.75   | 60.74   | 20.10  | 12.69  | 21.25  | 25.26  | 1.08   | 65.61  | 824.23  | 98.65  | 28.35  | 1.27   | 3.51   | 18.24  |
| <b>CNTF</b>                                   | 1011.83 | 588.90  | 615.20 | 388.39 | 443.82 | 607.59 | 295.60 | 280.32 | 1923.71 | 743.49 | 110.37 | 204.51 | 364.61 | 104.28 |
| <b>CNTF R alpha</b>                           | 48.36   | 20.11   | 17.33  | 14.31  | 0.91   | 19.37  | 1.08   | 28.93  | 150.91  | 27.33  | 23.78  | 18.13  | 4.91   | 16.42  |
| <b>Coagulation Factor III / Tissue Factor</b> | 112.84  | 14.08   | 3.27   | 2.70   | 0.91   | 1.68   | 1.08   | 28.63  | 14.04   | 1.28   | 39.03  | 25.30  | 1.75   | 29.79  |
| <b>CRIM 1</b>                                 | 15.29   | 27.76   | 10.55  | 2.16   | 0.91   | 1.68   | 1.08   | 16.70  | 33.09   | 1.28   | 98.48  | 120.60 | 1.05   | 72.66  |
| <b>Cripto-1</b>                               | 23.97   | 32.18   | 2.01   | 1.35   | 0.91   | 1.26   | 1.08   | 17.30  | 26.07   | 1.71   | 31.10  | 20.24  | 3.16   | 13.68  |

|                               |         |         |         |         |         |         |         |         |         |         |         |         |        |         |
|-------------------------------|---------|---------|---------|---------|---------|---------|---------|---------|---------|---------|---------|---------|--------|---------|
| <b>CRTH-2</b>                 | 78.95   | 37.81   | 61.55   | 71.84   | 106.55  | 1.68    | 155.39  | 119.88  | 268.23  | 183.20  | 25.31   | 63.25   | 140.02 | 4.56    |
| <b>Cryptic</b>                | 42.16   | 39.42   | 38.94   | 15.67   | 0.91    | 1.26    | 1.08    | 22.96   | 20.05   | 9.40    | 247.27  | 271.98  | 2.81   | 169.64  |
| <b>CTACK / CCL27</b>          | 177.32  | 83.27   | 122.34  | 56.72   | 138.43  | 1.26    | 68.30   | 81.12   | 545.98  | 319.01  | 194.52  | 450.34  | 462.52 | 110.36  |
| <b>CTGF / CCN2</b>            | 14.88   | 33.39   | 8.04    | 1.35    | 0.91    | 1.26    | 1.08    | 5.37    | 27.07   | 3.42    | 78.05   | 72.95   | 1.05   | 44.69   |
| <b>CTLA-4 / CD152</b>         | 25.21   | 17.30   | 5.02    | 3.78    | 0.91    | 2.95    | 1.08    | 0.89    | 24.57   | 1.28    | 31.10   | 13.07   | 8.77   | 17.63   |
| <b>CV-2 / Crossveinless-2</b> | 26.87   | 20.92   | 3.27    | 2.97    | 0.91    | 2.53    | 1.08    | 2.39    | 18.05   | 1.28    | 6.10    | 4.22    | 6.32   | 8.51    |
| <b>CXCL14 / BRAK</b>          | 4546.60 | 5189.49 | 1627.31 | 800.81  | 1278.65 | 1392.88 | 1393.81 | 3838.06 | 6477.56 | 5477.35 | 1521.11 | 1672.76 | 3.51   | 1679.99 |
| <b>CXCL16</b>                 | 33.07   | 7.64    | 1.51    | 7.83    | 6.98    | 6.32    | 1.08    | 42.05   | 1.50    | 1.28    | 3.35    | 1.27    | 2.46   | 0.91    |
| <b>CXCR1 / IL-8 RA</b>        | 1503.68 | 650.04  | 605.91  | 498.85  | 602.59  | 738.97  | 428.95  | 859.46  | 749.53  | 368.97  | 117.99  | 740.87  | 250.56 | 341.71  |
| <b>CXCR2 / IL-8 RB</b>        | 4397.39 | 6146.46 | 7199.82 | 6535.06 | 2945.27 | 5207.71 | 3675.16 | 1163.05 | 1256.41 | 501.78  | 1286.95 | 1637.34 | 370.58 | 646.64  |
| <b>CXCR3</b>                  | 47.53   | 37.41   | 20.85   | 10.80   | 38.55   | 43.79   | 1.08    | 29.52   | 26.57   | 22.63   | 206.11  | 86.02   | 1.40   | 67.19   |
| <b>CXCR4 (fusin)</b>          | 494.34  | 368.47  | 330.84  | 410.80  | 751.04  | 828.65  | 53.84   | 55.17   | 140.38  | 38.01   | 114.64  | 146.74  | 54.39  | 53.81   |
| <b>CXCR5 / BLR-1</b>          | 16.95   | 15.29   | 0.75    | 11.07   | 0.91    | 1.26    | 1.08    | 5.67    | 29.08   | 1.28    | 90.86   | 55.66   | 2.81   | 49.86   |
| <b>CXCR6</b>                  | 59.93   | 68.38   | 145.95  | 100.20  | 378.25  | 126.32  | 1.08    | 68.59   | 112.30  | 8.97    | 56.10   | 46.81   | 21.06  | 32.53   |
| <b>D6</b>                     | 12.40   | 19.31   | 58.78   | 13.77   | 0.91    | 16.84   | 1.08    | 16.70   | 24.57   | 2.99    | 121.04  | 19.82   | 1.05   | 56.55   |
| <b>DAN</b>                    | 1.24    | 11.26   | 0.75    | 3.78    | 0.91    | 1.26    | 1.08    | 0.89    | 49.13   | 2.99    | 2.74    | 1.27    | 1.75   | 1.52    |
| <b>DANCE</b>                  | 1.24    | 16.49   | 2.26    | 2.43    | 0.91    | 1.26    | 1.08    | 0.89    | 12.53   | 2.99    | 26.22   | 1.27    | 1.05   | 20.37   |
| <b>DcR3 / TNFRSF6B</b>        | 1.24    | 38.62   | 6.53    | 2.70    | 0.91    | 1.26    | 1.08    | 5.96    | 23.56   | 5.98    | 183.54  | 117.65  | 1.05   | 103.97  |
| <b>Decorin</b>                | 16.12   | 89.70   | 8.54    | 4.59    | 0.91    | 4.63    | 1.08    | 0.89    | 24.07   | 9.82    | 60.67   | 33.73   | 1.05   | 40.13   |
| <b>Dkk-1</b>                  | 5.37    | 26.15   | 0.75    | 1.62    | 0.91    | 1.26    | 1.08    | 0.89    | 550.49  | 5.12    | 142.69  | 98.67   | 1.05   | 114.61  |
| <b>Dkk-3</b>                  | 3.31    | 23.33   | 5.28    | 1.35    | 0.91    | 1.26    | 1.08    | 0.89    | 18.05   | 4.70    | 40.86   | 12.65   | 1.05   | 23.11   |
| <b>Dkk-4</b>                  | 7.85    | 16.89   | 11.30   | 10.80   | 1.52    | 2.53    | 1.08    | 4.18    | 37.10   | 1.71    | 67.99   | 47.65   | 1.05   | 24.63   |
| <b>DR3 / TNFRSF25</b>         | 1.24    | 24.94   | 33.66   | 9.99    | 0.91    | 1.26    | 1.08    | 5.37    | 7.52    | 1.28    | 2.74    | 1.27    | 2.11   | 1.82    |
| <b>DR6 / TNFRSF21</b>         | 1.24    | 36.61   | 27.63   | 29.98   | 19.43   | 5.05    | 1.08    | 1.19    | 33.09   | 1.71    | 174.70  | 277.46  | 2.46   | 99.41   |
| <b>Dtk</b>                    | 17.36   | 55.11   | 26.88   | 5.94    | 18.52   | 2.11    | 1.08    | 0.89    | 1046.84 | 2.56    | 114.03  | 27.83   | 1.05   | 35.87   |
| <b>EDA-A2</b>                 | 23.15   | 18.91   | 0.75    | 0.81    | 0.91    | 1.26    | 1.08    | 0.89    | 1.50    | 2.99    | 125.92  | 10.12   | 1.05   | 53.20   |
| <b>EDAR</b>                   | 97.13   | 17.30   | 1.76    | 0.81    | 0.91    | 4.63    | 1.08    | 15.81   | 14.04   | 1.28    | 126.84  | 43.43   | 1.05   | 78.44   |



|                           |         |         |         |         |         |         |         |         |          |         |        |         |         |        |
|---------------------------|---------|---------|---------|---------|---------|---------|---------|---------|----------|---------|--------|---------|---------|--------|
| <b>EDG-1</b>              | 25.63   | 15.29   | 3.27    | 22.96   | 2.73    | 1.26    | 1.08    | 9.84    | 2.51     | 1.28    | 66.16  | 47.23   | 9.83    | 55.03  |
| <b>EGF</b>                | 12.40   | 13.27   | 6.03    | 0.81    | 0.91    | 1.26    | 1.08    | 3.28    | 1.50     | 1.28    | 37.20  | 6.33    | 1.05    | 16.11  |
| <b>EGF R / ErbB1</b>      | 49.19   | 17.30   | 0.75    | 18.10   | 0.91    | 2.53    | 1.08    | 3.28    | 1.50     | 5.12    | 5.49   | 1.27    | 1.05    | 3.65   |
| <b>EG-VEGF / PK1</b>      | 632.39  | 869.68  | 1643.14 | 3033.63 | 4348.38 | 2690.59 | 1730.97 | 846.04  | 308.34   | 3770.85 | 279.89 | 14.34   | 142.83  | 169.34 |
| <b>EMAP-II</b>            | 114.49  | 31.38   | 0.75    | 8.91    | 0.91    | 128.00  | 1.08    | 65.61   | 1.50     | 17.08   | 53.97  | 1.27    | 1.75    | 34.35  |
| <b>ENA-78</b>             | 37.20   | 69.59   | 5.02    | 6.21    | 18.21   | 21.05   | 1.08    | 34.59   | 109.80   | 28.19   | 41.47  | 32.47   | 1.05    | 29.19  |
| <b>Endocan</b>            | 103.33  | 24.54   | 2.26    | 2.97    | 0.91    | 1.68    | 1.08    | 20.88   | 16.04    | 4.27    | 74.39  | 36.69   | 1.05    | 52.29  |
| <b>Endoglin / CD105</b>   | 24.80   | 92.92   | 1.51    | 0.81    | 0.91    | 1.26    | 1.08    | 7.46    | 47.13    | 1.28    | 87.50  | 57.77   | 1.05    | 65.36  |
| <b>Endostatin</b>         | 25.21   | 14.88   | 0.75    | 3.24    | 0.91    | 4.63    | 2.89    | 2.39    | 30.58    | 1.28    | 7.93   | 1.69    | 5.26    | 12.16  |
| <b>EN-RAGE</b>            | 97.96   | 17.30   | 9.55    | 10.80   | 164.84  | 2.95    | 10.84   | 128.83  | 13.04    | 3.84    | 106.71 | 50.60   | 1.05    | 51.68  |
| <b>Eotaxin / CCL11</b>    | 31.00   | 80.05   | 47.48   | 16.75   | 44.93   | 15.16   | 5.42    | 57.56   | 38.60    | 7.26    | 67.69  | 57.77   | 1.05    | 44.39  |
| <b>Eotaxin-2 / MPIF-2</b> | 52.91   | 53.10   | 33.91   | 32.68   | 27.93   | 24.00   | 8.67    | 31.61   | 12.53    | 2.99    | 85.06  | 61.99   | 1.05    | 49.55  |
| <b>Eotaxin-3 / CCL26</b>  | 4.55    | 22.93   | 20.10   | 33.49   | 4.55    | 21.05   | 32.88   | 20.88   | 152.91   | 7.26    | 175.62 | 49.34   | 2.11    | 83.00  |
| <b>Epiregulin</b>         | 1.65    | 21.72   | 12.06   | 8.10    | 0.91    | 1.26    | 1.08    | 16.10   | 14.54    | 1.28    | 56.71  | 34.16   | 1.40    | 23.41  |
| <b>ErbB2</b>              | 2.48    | 19.31   | 19.59   | 10.26   | 0.91    | 1.26    | 2.89    | 23.86   | 27.07    | 1.71    | 60.67  | 40.06   | 12.63   | 24.32  |
| <b>ErbB3</b>              | 23.56   | 34.59   | 85.16   | 20.53   | 21.86   | 26.95   | 57.10   | 24.75   | 37.10    | 17.94   | 136.59 | 84.33   | 4.56    | 57.16  |
| <b>ErbB4</b>              | 22.73   | 22.53   | 17.58   | 9.99    | 26.41   | 26.53   | 35.78   | 26.84   | 177.98   | 10.68   | 62.81  | 15.18   | 11.23   | 21.89  |
| <b>Erythropoietin</b>     | 3700.93 | 2366.87 | 5879.48 | 3163.27 | 2924.02 | 2189.11 | 7505.70 | 9832.52 | 10435.78 | 9943.87 | 658.87 | 1507.04 | 4022.29 | 419.85 |
| <b>E-Selectin</b>         | 3.72    | 41.03   | 25.12   | 4.32    | 27.32   | 1.26    | 40.11   | 57.26   | 294.80   | 5.98    | 27.75  | 15.18   | 1.05    | 13.07  |
| <b>Endothelin</b>         | 38.03   | 29.77   | 18.84   | 16.21   | 64.66   | 15.58   | 119.61  | 25.65   | 60.66    | 20.93   | 24.09  | 3.80    | 34.04   | 13.68  |
| <b>FADD</b>               | 69.85   | 12.47   | 0.75    | 2.43    | 18.82   | 1.26    | 63.96   | 37.58   | 19.05    | 1.28    | 10.67  | 1.27    | 11.58   | 15.50  |
| <b>FAM3B</b>              | 33.07   | 13.27   | 3.77    | 2.43    | 0.91    | 1.26    | 1.08    | 2.68    | 3.51     | 1.28    | 64.33  | 18.55   | 1.05    | 29.19  |
| <b>Fas / TNFRSF6</b>      | 16.12   | 28.96   | 6.03    | 4.59    | 1.82    | 1.26    | 1.08    | 3.28    | 17.55    | 1.28    | 76.53  | 53.97   | 5.61    | 45.91  |
| <b>Fas Ligand</b>         | 28.52   | 19.31   | 8.29    | 5.13    | 0.91    | 1.26    | 3.25    | 5.37    | 51.64    | 1.28    | 51.53  | 38.37   | 1.75    | 27.36  |
| <b>FGF Basic</b>          | 34.31   | 20.92   | 75.36   | 27.55   | 21.25   | 13.05   | 1.08    | 19.38   | 63.17    | 1.28    | 82.02  | 105.00  | 2.11    | 64.76  |
| <b>FGF-BP</b>             | 14.05   | 15.69   | 23.11   | 11.34   | 0.91    | 1.26    | 1.08    | 10.44   | 16.54    | 1.28    | 47.87  | 20.66   | 1.05    | 27.97  |
| <b>FGF R3</b>             | 22.32   | 49.08   | 16.08   | 12.42   | 0.91    | 1.26    | 1.08    | 7.16    | 604.14   | 25.62   | 120.43 | 85.60   | 1.75    | 91.81  |

|                           |         |         |         |         |         |         |         |         |         |         |         |         |         |         |
|---------------------------|---------|---------|---------|---------|---------|---------|---------|---------|---------|---------|---------|---------|---------|---------|
| <b>FGF R4</b>             | 6209.83 | 4879.36 | 3216.19 | 3118.44 | 2212.14 | 5045.18 | 4144.22 | 5800.03 | 3342.56 | 6334.86 | 1332.99 | 1278.92 | 1109.62 | 1164.08 |
| <b>FGF R5</b>             | 44.23   | 15.69   | 4.52    | 0.81    | 0.91    | 95.58   | 37.22   | 34.59   | 2.01    | 1.28    | 107.32  | 23.19   | 1.05    | 46.21   |
| <b>FGF-4</b>              | 27.69   | 35.40   | 19.59   | 0.81    | 10.63   | 24.84   | 95.04   | 14.91   | 20.05   | 20.07   | 145.43  | 110.48  | 4.56    | 70.23   |
| <b>FGF-5</b>              | 2.07    | 31.38   | 9.80    | 3.78    | 6.07    | 1.26    | 1.08    | 9.24    | 15.54   | 2.99    | 23.17   | 5.90    | 5.61    | 11.55   |
| <b>FGF-6</b>              | 1.24    | 13.27   | 3.01    | 2.70    | 9.71    | 10.11   | 1.08    | 0.89    | 2.51    | 1.28    | 144.82  | 43.01   | 1.05    | 64.76   |
| <b>FGF-7 / KGF</b>        | 1.24    | 29.77   | 4.02    | 1.62    | 9.11    | 6.32    | 1.08    | 2.98    | 1.50    | 1.28    | 73.48   | 50.60   | 1.05    | 63.84   |
| <b>FGF-8</b>              | 9.09    | 12.87   | 11.56   | 0.81    | 18.52   | 1.26    | 1.08    | 73.06   | 14.54   | 8.97    | 21.65   | 2.95    | 1.05    | 22.19   |
| <b>FGF-9</b>              | 30.59   | 20.92   | 35.42   | 38.89   | 26.41   | 1.26    | 5.42    | 25.94   | 77.21   | 114.02  | 569.84  | 608.89  | 127.03  | 672.18  |
| <b>FGF-10 / KGF-2</b>     | 31.41   | 16.09   | 0.75    | 1.35    | 22.77   | 1.26    | 28.19   | 15.21   | 39.61   | 36.30   | 63.42   | 11.39   | 23.16   | 30.40   |
| <b>FGF-11</b>             | 26.04   | 15.29   | 8.04    | 12.42   | 2.13    | 2.95    | 1.08    | 28.33   | 7.02    | 24.77   | 12.20   | 6.75    | 9.83    | 9.73    |
| <b>FGF-12</b>             | 97.96   | 12.87   | 5.78    | 11.88   | 2.43    | 2.95    | 1.08    | 49.21   | 1.50    | 3.84    | 36.59   | 16.02   | 1.05    | 22.50   |
| <b>FGF-13 1B</b>          | 1201.54 | 862.84  | 0.75    | 21.88   | 3.34    | 1.26    | 342.94  | 697.23  | 1.50    | 562.43  | 23.17   | 105.00  | 40.71   | 21.59   |
| <b>FGF-16</b>             | 34.31   | 10.46   | 14.32   | 7.29    | 8.20    | 13.05   | 24.21   | 2.98    | 44.62   | 12.38   | 45.43   | 37.53   | 5.26    | 22.19   |
| <b>FGF-17</b>             | 6.20    | 2.41    | 10.30   | 5.40    | 3.95    | 1.68    | 1.08    | 12.23   | 5.01    | 2.14    | 8.23    | 2.95    | 4.56    | 4.56    |
| <b>FGF-18</b>             | 2.07    | 2.82    | 14.32   | 8.37    | 7.89    | 1.26    | 1.08    | 16.10   | 12.03   | 1.71    | 11.59   | 5.90    | 1.05    | 7.30    |
| <b>FGF-19</b>             | 200.88  | 23.33   | 3.77    | 6.75    | 5.16    | 1.26    | 15.18   | 62.03   | 1.50    | 5.98    | 17.07   | 34.16   | 12.98   | 16.42   |
| <b>FGF-20</b>             | 12.40   | 7.24    | 4.27    | 4.59    | 0.91    | 2.11    | 7.59    | 13.72   | 1.50    | 3.84    | 11.28   | 8.86    | 1.05    | 12.46   |
| <b>FGF-21</b>             | 90.52   | 4.83    | 3.01    | 3.51    | 0.91    | 1.68    | 9.40    | 43.84   | 1.50    | 2.56    | 18.90   | 1.27    | 7.37    | 8.82    |
| <b>FGF-23</b>             | 1.65    | 9.65    | 8.79    | 5.13    | 0.91    | 7.58    | 38.31   | 14.61   | 34.09   | 9.40    | 198.18  | 2.53    | 3.51    | 121.61  |
| <b>FLRG</b>               | 3.72    | 12.07   | 3.52    | 2.97    | 0.91    | 1.68    | 17.71   | 8.35    | 26.07   | 2.56    | 5.49    | 3.37    | 1.05    | 2.74    |
| <b>Flt-3 Ligand</b>       | 5.79    | 62.75   | 40.44   | 8.91    | 0.91    | 1.68    | 5.42    | 61.13   | 435.18  | 2.56    | 25.92   | 10.96   | 1.05    | 6.38    |
| <b>Follistatin</b>        | 1261.89 | 953.75  | 1429.36 | 372.99  | 7.59    | 7.58    | 118.89  | 763.44  | 1055.36 | 459.08  | 51.83   | 226.01  | 84.92   | 79.65   |
| <b>Follistatin-like 1</b> | 74.81   | 51.49   | 35.42   | 34.84   | 11.54   | 2.53    | 100.10  | 67.40   | 101.78  | 53.81   | 37.81   | 119.75  | 66.32   | 185.75  |
| <b>Fractalkine</b>        | 14.47   | 16.89   | 11.05   | 9.72    | 2.43    | 1.26    | 34.33   | 18.79   | 14.54   | 14.95   | 7.32    | 6.75    | 1.05    | 6.99    |
| <b>Frizzled-1</b>         | 1.24    | 4.83    | 3.52    | 2.16    | 3.64    | 1.26    | 1.08    | 0.89    | 5.51    | 3.42    | 14.94   | 7.17    | 1.05    | 6.08    |
| <b>Frizzled-3</b>         | 1.24    | 1.61    | 3.27    | 2.97    | 0.91    | 1.26    | 1.08    | 1.49    | 4.01    | 2.99    | 10.37   | 3.80    | 1.05    | 5.78    |
| <b>Frizzled-4</b>         | 3.31    | 5.23    | 4.27    | 3.24    | 0.91    | 2.11    | 9.76    | 13.12   | 20.05   | 1.28    | 9.76    | 7.17    | 1.05    | 8.51    |

|                              |         |        |        |        |        |        |         |         |        |         |         |         |        |         |
|------------------------------|---------|--------|--------|--------|--------|--------|---------|---------|--------|---------|---------|---------|--------|---------|
| <b>Frizzled-5</b>            | 19.84   | 1.21   | 1.00   | 2.97   | 0.91   | 2.53   | 1.81    | 11.33   | 1.50   | 1.28    | 45.73   | 13.07   | 4.21   | 36.48   |
| <b>Frizzled-6</b>            | 34.72   | 1.21   | 2.76   | 1.35   | 0.91   | 1.26   | 1.08    | 11.63   | 1.50   | 1.28    | 41.47   | 51.87   | 12.28  | 48.95   |
| <b>Frizzled-7</b>            | 19.43   | 1.21   | 3.52   | 0.81   | 1.52   | 1.26   | 1.08    | 2.09    | 5.51   | 1.28    | 8.23    | 40.90   | 1.40   | 31.62   |
| <b>Galectin-3</b>            | 97.96   | 14.48  | 8.29   | 11.34  | 15.48  | 13.47  | 31.44   | 28.93   | 1.50   | 11.10   | 88.42   | 112.59  | 9.12   | 74.48   |
| <b>GASP-1 / WFIKKNRP</b>     | 165.74  | 176.59 | 597.37 | 579.34 | 560.09 | 543.59 | 97.21   | 133.60  | 252.18 | 417.66  | 786.01  | 1594.75 | 76.50  | 567.29  |
| <b>GASP-2 / WFIKKN</b>       | 15.71   | 9.65   | 3.27   | 8.91   | 0.91   | 16.42  | 31.08   | 9.54    | 1.50   | 7.26    | 154.58  | 70.00   | 9.83   | 104.28  |
| <b>GCP-2 / CXCL6</b>         | 16.95   | 14.48  | 13.82  | 3.24   | 22.16  | 4.21   | 14.09   | 19.38   | 1.50   | 16.23   | 37.50   | 8.01    | 2.81   | 33.75   |
| <b>GCSF</b>                  | 29.35   | 37.81  | 59.79  | 20.80  | 45.23  | 16.84  | 30.72   | 54.87   | 65.68  | 46.12   | 27.75   | 30.36   | 13.34  | 17.94   |
| <b>G-CSF R / CD 114</b>      | 23.56   | 46.66  | 60.04  | 0.81   | 20.64  | 1.26   | 7.95    | 72.17   | 164.45 | 28.61   | 34.45   | 25.72   | 1.05   | 14.90   |
| <b>GDF1</b>                  | 9.09    | 113.84 | 11.56  | 8.91   | 16.70  | 14.74  | 44.45   | 13.12   | 34.09  | 24.34   | 2.44    | 1.27    | 1.05   | 3.04    |
| <b>GDF3</b>                  | 61.59   | 29.77  | 26.88  | 29.44  | 39.16  | 47.58  | 115.64  | 49.80   | 74.70  | 37.15   | 30.18   | 22.77   | 17.90  | 18.24   |
| <b>GDF5</b>                  | 72.33   | 51.09  | 68.08  | 43.75  | 45.84  | 85.90  | 107.69  | 64.41   | 80.22  | 42.28   | 43.29   | 40.90   | 23.51  | 22.19   |
| <b>GDF8</b>                  | 13.23   | 12.07  | 23.61  | 10.26  | 0.91   | 4.63   | 1.08    | 15.51   | 22.06  | 12.81   | 37.50   | 18.55   | 1.05   | 18.85   |
| <b>GDF9</b>                  | 51.67   | 27.76  | 21.35  | 10.80  | 48.88  | 8.42   | 1.08    | 33.10   | 136.87 | 29.89   | 50.00   | 33.73   | 16.84  | 34.35   |
| <b>GDF11</b>                 | 48.36   | 24.14  | 43.71  | 26.47  | 3.64   | 9.26   | 15.90   | 100.50  | 57.15  | 22.21   | 83.54   | 60.72   | 16.84  | 45.91   |
| <b>GDF-15</b>                | 138.46  | 101.37 | 114.05 | 135.04 | 193.07 | 50.11  | 174.90  | 294.34  | 269.73 | 394.59  | 14.94   | 41.75   | 63.87  | 152.92  |
| <b>GDNF</b>                  | 1.24    | 1.21   | 0.75   | 0.81   | 6.07   | 1.26   | 31.80   | 0.89    | 1.50   | 1.28    | 9.45    | 5.48    | 2.81   | 4.56    |
| <b>GFR alpha-1</b>           | 14.47   | 14.08  | 12.81  | 9.45   | 11.84  | 1.26   | 28.91   | 16.70   | 17.55  | 11.96   | 6.10    | 2.53    | 1.05   | 4.56    |
| <b>GFR alpha-2</b>           | 2.89    | 16.49  | 4.27   | 3.78   | 0.91   | 1.26   | 12.29   | 1.49    | 3.01   | 2.99    | 11.59   | 8.43    | 3.51   | 20.37   |
| <b>GFR alpha-3</b>           | 9.92    | 49.48  | 31.90  | 18.10  | 7.59   | 1.68   | 18.07   | 21.17   | 33.59  | 14.09   | 15.85   | 14.76   | 4.56   | 13.38   |
| <b>GFR alpha-4</b>           | 4.96    | 651.65 | 12.81  | 7.02   | 6.07   | 1.26   | 3.25    | 11.33   | 33.09  | 2.56    | 21.65   | 15.18   | 1.75   | 10.94   |
| <b>GITR / TNFRF18</b>        | 4.55    | 22.53  | 22.61  | 11.07  | 1.52   | 2.11   | 21.68   | 34.89   | 347.94 | 22.63   | 48.17   | 38.37   | 1.05   | 31.31   |
| <b>GITR Ligand / TNFSF18</b> | 1.65    | 12.47  | 7.54   | 10.53  | 1.21   | 1.68   | 19.88   | 11.33   | 17.55  | 11.10   | 73.48   | 38.79   | 1.05   | 57.46   |
| <b>Glucagon</b>              | 3.72    | 21.32  | 26.88  | 22.96  | 4.25   | 1.26   | 97.57   | 53.98   | 68.69  | 46.55   | 2017.47 | 35.42   | 38.60  | 1151.01 |
| <b>Glut1</b>                 | 39.27   | 22.93  | 14.57  | 16.75  | 16.39  | 1.26   | 36.14   | 53.08   | 75.71  | 23.91   | 73.17   | 91.08   | 5.26   | 33.44   |
| <b>Glut2</b>                 | 1244.12 | 814.97 | 245.43 | 834.57 | 349.41 | 2.53   | 1188.91 | 1485.42 | 888.41 | 1377.24 | 117.08  | 759.42  | 738.69 | 163.86  |
| <b>Glut3</b>                 | 16.53   | 11.26  | 9.29   | 10.26  | 13.36  | 1.26   | 32.16   | 10.74   | 19.05  | 11.96   | 8.54    | 8.01    | 2.11   | 4.26    |

|                                           |        |        |        |        |        |        |        |        |         |        |         |         |        |         |
|-------------------------------------------|--------|--------|--------|--------|--------|--------|--------|--------|---------|--------|---------|---------|--------|---------|
| <b>Glut5</b>                              | 1.24   | 32.98  | 41.70  | 18.91  | 0.91   | 2.53   | 48.06  | 44.73  | 150.41  | 69.18  | 2.44    | 2.95    | 4.21   | 1.22    |
| <b>Glypican 3</b>                         | 1.65   | 12.47  | 9.04   | 9.99   | 0.91   | 1.26   | 34.69  | 37.28  | 17.55   | 11.96  | 31.71   | 75.90   | 6.32   | 26.15   |
| <b>Glypican 5</b>                         | 2.07   | 18.10  | 13.31  | 12.15  | 3.64   | 1.68   | 37.22  | 26.84  | 71.19   | 27.33  | 14.03   | 12.65   | 26.32  | 13.68   |
| <b>GM-CSF</b>                             | 12.40  | 19.71  | 19.59  | 24.85  | 3.64   | 8.42   | 57.10  | 20.28  | 21.06   | 10.68  | 14.94   | 13.92   | 5.61   | 11.25   |
| <b>GM-CSF R alpha</b>                     | 9.51   | 3.22   | 0.75   | 4.32   | 0.91   | 1.26   | 35.78  | 2.68   | 1.50    | 1.28   | 44.51   | 47.65   | 1.05   | 27.67   |
| <b>Granzyme A</b>                         | 74.81  | 104.99 | 53.76  | 42.94  | 2.13   | 1.26   | 66.85  | 149.41 | 156.93  | 61.92  | 214.34  | 94.03   | 24.56  | 186.36  |
| <b>GREMLIN</b>                            | 83.08  | 30.97  | 43.46  | 36.46  | 13.66  | 7.58   | 32.52  | 50.70  | 13.04   | 58.08  | 272.88  | 284.63  | 50.18  | 215.55  |
| <b>GRO</b>                                | 35.55  | 44.25  | 56.02  | 16.21  | 2.73   | 1.26   | 2.53   | 130.92 | 1.50    | 24.34  | 39.94   | 54.40   | 12.63  | 33.75   |
| <b>GRO-a</b>                              | 40.51  | 44.25  | 42.96  | 19.99  | 2.73   | 1.26   | 1.08   | 124.06 | 1.50    | 28.61  | 96.65   | 125.24  | 23.51  | 86.34   |
| <b>Growth Hormone (GH)</b>                | 17.77  | 39.02  | 29.89  | 12.96  | 19.13  | 11.79  | 22.04  | 27.44  | 683.35  | 21.35  | 183.54  | 110.48  | 5.26   | 57.76   |
| <b>Growth Hormone R (GHR)</b>             | 31.41  | 30.17  | 21.10  | 12.15  | 23.07  | 13.47  | 39.03  | 41.75  | 32.09   | 28.61  | 110.07  | 94.88   | 13.69  | 65.97   |
| <b>HB-EGF</b>                             | 833.68 | 592.92 | 781.75 | 581.77 | 411.65 | 674.12 | 294.16 | 707.97 | 1273.45 | 310.47 | 1920.82 | 1989.43 | 620.43 | 1679.99 |
| <b>HCC-4 / CCL16</b>                      | 20.67  | 25.74  | 26.63  | 9.99   | 20.34  | 13.90  | 21.32  | 31.61  | 9.02    | 22.63  | 50.92   | 40.06   | 1.05   | 34.05   |
| <b>HCR / CRAM-A/B</b>                     | 19.84  | 11.67  | 13.82  | 10.53  | 19.43  | 13.47  | 32.88  | 11.33  | 1.50    | 16.23  | 97.87   | 69.58   | 6.67   | 69.92   |
| <b>Hepassocin</b>                         | 160.78 | 69.59  | 51.75  | 30.25  | 57.68  | 30.32  | 49.15  | 104.67 | 115.81  | 49.96  | 57.93   | 85.18   | 4.56   | 37.70   |
| <b>Heregulin / NDF / GGF / Neuregulin</b> | 90.52  | 13.68  | 10.30  | 8.64   | 3.34   | 1.26   | 1.08   | 58.45  | 14.04   | 19.64  | 148.18  | 73.79   | 3.16   | 101.54  |
| <b>HGF</b>                                | 10.75  | 11.26  | 12.06  | 11.07  | 4.86   | 3.79   | 1.08   | 21.47  | 13.54   | 16.65  | 292.39  | 278.30  | 2.81   | 231.05  |
| <b>HGFR</b>                               | 32.24  | 24.54  | 31.40  | 17.29  | 4.86   | 2.11   | 28.19  | 114.81 | 84.23   | 31.60  | 55.19   | 22.77   | 2.81   | 35.27   |
| <b>HRG-alpha</b>                          | 76.05  | 18.10  | 7.54   | 3.78   | 1.82   | 1.26   | 1.08   | 45.93  | 5.51    | 4.27   | 18.60   | 25.72   | 4.56   | 8.82    |
| <b>HRG-beta 1</b>                         | 27.28  | 11.26  | 6.78   | 2.97   | 1.52   | 1.26   | 3.61   | 25.05  | 3.51    | 2.99   | 4.88    | 2.53    | 2.11   | 1.22    |
| <b>HVEM / TNFRSF14</b>                    | 17.36  | 38.62  | 28.14  | 5.40   | 4.86   | 1.26   | 8.31   | 43.24  | 23.56   | 6.41   | 10.06   | 10.96   | 1.75   | 8.51    |
| <b>I-309</b>                              | 11.16  | 12.07  | 3.01   | 2.70   | 0.91   | 1.26   | 11.93  | 9.84   | 13.04   | 2.56   | 13.72   | 5.48    | 1.05   | 2.13    |
| <b>ICAM-1</b>                             | 12.81  | 15.29  | 6.78   | 3.51   | 1.82   | 1.26   | 8.31   | 14.02  | 20.56   | 2.99   | 7.62    | 7.59    | 1.05   | 7.90    |
| <b>ICAM-2</b>                             | 61.17  | 21.32  | 7.03   | 4.32   | 2.73   | 1.26   | 6.50   | 36.08  | 44.62   | 1.28   | 4.27    | 15.60   | 4.21   | 10.03   |
| <b>ICAM-3 (CD50)</b>                      | 1.24   | 16.09  | 1.76   | 2.97   | 0.91   | 1.68   | 1.08   | 0.89   | 13.54   | 4.27   | 0.91    | 1.27    | 1.05   | 0.91    |
| <b>ICAM-5</b>                             | 1.65   | 12.47  | 8.54   | 4.59   | 3.64   | 2.11   | 3.25   | 4.18   | 41.61   | 2.14   | 8.23    | 20.66   | 11.23  | 9.73    |

|                               |        |         |        |       |       |      |        |        |         |       |        |        |       |        |
|-------------------------------|--------|---------|--------|-------|-------|------|--------|--------|---------|-------|--------|--------|-------|--------|
| <b>IFN-alpha / beta R1</b>    | 1.24   | 22.12   | 10.30  | 3.78  | 3.34  | 1.26 | 18.43  | 12.82  | 17.55   | 2.14  | 27.14  | 21.08  | 1.05  | 15.50  |
| <b>IFN-alpha / beta R2</b>    | 27.28  | 14.48   | 9.04   | 3.51  | 0.91  | 1.26 | 3.25   | 59.35  | 15.54   | 2.56  | 3.35   | 1.27   | 1.05  | 4.56   |
| <b>IFN-beta</b>               | 18.60  | 46.66   | 15.32  | 4.59  | 4.25  | 1.26 | 2.53   | 21.17  | 21.06   | 4.27  | 7.93   | 5.06   | 1.75  | 4.86   |
| <b>IFN-gamma</b>              | 28.52  | 76.03   | 56.27  | 9.99  | 6.38  | 3.37 | 29.63  | 61.43  | 42.62   | 3.84  | 35.98  | 30.36  | 7.72  | 19.46  |
| <b>IFN-gamma R1</b>           | 1.65   | 34.19   | 17.58  | 6.21  | 1.21  | 1.26 | 22.77  | 42.94  | 5.01    | 5.55  | 23.78  | 46.81  | 1.05  | 21.28  |
| <b>IGFBP-1</b>                | 1.24   | 58.33   | 13.31  | 5.13  | 3.34  | 1.26 | 6.87   | 32.21  | 27.57   | 8.54  | 18.29  | 53.13  | 1.05  | 14.90  |
| <b>IGFBP-2</b>                | 1.24   | 32.98   | 14.32  | 3.78  | 6.07  | 1.68 | 18.79  | 17.89  | 9.02    | 2.14  | 30.79  | 108.37 | 1.05  | 35.57  |
| <b>IGFBP-3</b>                | 12.40  | 12.47   | 9.80   | 8.64  | 18.52 | 2.53 | 18.79  | 9.84   | 19.55   | 29.89 | 0.91   | 5.06   | 1.05  | 1.22   |
| <b>IGFBP-4</b>                | 11.57  | 12.47   | 8.29   | 1.35  | 11.23 | 1.26 | 2.89   | 12.53  | 17.55   | 11.53 | 156.41 | 101.20 | 1.05  | 71.14  |
| <b>IGFBP-6</b>                | 112.84 | 63.56   | 126.86 | 0.81  | 57.38 | 1.26 | 1.08   | 70.98  | 162.44  | 93.95 | 60.67  | 86.86  | 12.98 | 64.45  |
| <b>IGFBP-rp1 / IGFBP-7</b>    | 25.63  | 60.74   | 50.99  | 8.10  | 9.11  | 1.68 | 2.17   | 77.24  | 8.02    | 1.28  | 75.00  | 83.91  | 1.05  | 54.72  |
| <b>IGF-I</b>                  | 11.57  | 13.68   | 9.80   | 2.43  | 3.04  | 1.26 | 2.17   | 15.21  | 1.50    | 1.28  | 73.48  | 55.24  | 1.05  | 41.04  |
| <b>IGF-I SR</b>               | 20.67  | 66.77   | 29.89  | 0.81  | 1.52  | 1.26 | 1.08   | 27.44  | 1.50    | 1.28  | 61.28  | 62.83  | 1.05  | 43.17  |
| <b>IGF-II</b>                 | 10.33  | 11.67   | 9.04   | 2.16  | 2.73  | 1.26 | 35.41  | 17.30  | 29.08   | 13.24 | 8.54   | 5.48   | 1.05  | 9.73   |
| <b>IGF-II R</b>               | 13.64  | 11.67   | 7.54   | 0.81  | 2.43  | 1.26 | 29.63  | 14.91  | 14.54   | 16.65 | 16.16  | 7.17   | 1.05  | 7.90   |
| <b>IL-1 alpha</b>             | 92.59  | 1767.51 | 41.95  | 0.81  | 2.43  | 1.26 | 43.36  | 116.60 | 1215.80 | 49.54 | 149.09 | 89.82  | 7.02  | 118.87 |
| <b>IL-1 beta</b>              | 14.05  | 20.92   | 9.80   | 3.24  | 13.36 | 1.26 | 344.39 | 20.28  | 15.04   | 14.95 | 89.94  | 94.45  | 1.05  | 63.24  |
| <b>IL-1 F5 / FIL1delta</b>    | 45.05  | 25.74   | 82.14  | 5.67  | 36.43 | 2.11 | 62.88  | 34.89  | 69.19   | 39.72 | 98.18  | 88.55  | 4.91  | 66.28  |
| <b>IL-1 F6 / FIL1 epsilon</b> | 42.16  | 18.91   | 44.97  | 0.81  | 28.54 | 1.26 | 58.18  | 22.96  | 65.68   | 29.89 | 89.64  | 88.55  | 1.40  | 67.49  |
| <b>IL-1 F7 / FIL1 zeta</b>    | 43.81  | 24.94   | 24.37  | 8.37  | 11.54 | 2.95 | 65.05  | 54.87  | 235.14  | 43.56 | 70.73  | 60.72  | 1.05  | 35.57  |
| <b>IL-1 F8 / FIL1 eta</b>     | 13.64  | 21.32   | 17.33  | 0.81  | 2.73  | 1.26 | 38.67  | 22.07  | 23.56   | 13.67 | 76.83  | 43.43  | 1.05  | 53.51  |
| <b>IL-1 F9 / IL-1 H1</b>      | 14.47  | 13.27   | 8.79   | 0.81  | 3.04  | 1.26 | 53.84  | 19.68  | 22.06   | 12.38 | 83.24  | 90.66  | 1.05  | 52.29  |
| <b>IL-1 F10 / IL-1HY2</b>     | 112.84 | 11.67   | 7.79   | 4.32  | 1.52  | 1.68 | 1.08   | 38.77  | 17.05   | 11.53 | 10.98  | 39.22  | 2.11  | 16.11  |
| <b>IL-1 R3 / IL-1 R AcP</b>   | 117.38 | 30.17   | 11.05  | 13.50 | 12.14 | 1.26 | 16.62  | 84.99  | 41.11   | 43.99 | 22.26  | 78.01  | 6.32  | 28.27  |
| <b>IL-1 R4 /ST2</b>           | 28.52  | 22.53   | 32.91  | 13.77 | 12.45 | 1.26 | 42.28  | 75.75  | 53.65   | 39.72 | 36.59  | 70.42  | 10.18 | 24.02  |
| <b>IL-1 R6 / IL-1 Rrp2</b>    | 3.72   | 14.08   | 12.31  | 6.48  | 1.52  | 1.68 | 13.73  | 21.77  | 9.02    | 70.04 | 45.73  | 52.71  | 1.05  | 27.36  |
| <b>IL-1 R8</b>                | 8.27   | 11.67   | 7.28   | 3.51  | 2.43  | 1.26 | 1.08   | 15.21  | 10.03   | 7.26  | 26.83  | 18.98  | 2.11  | 16.11  |

|                           |         |         |         |         |         |       |         |         |         |         |         |         |         |        |
|---------------------------|---------|---------|---------|---------|---------|-------|---------|---------|---------|---------|---------|---------|---------|--------|
| <b>IL-1 R9</b>            | 2.07    | 28.16   | 4.27    | 4.59    | 7.89    | 2.11  | 6.14    | 11.03   | 11.53   | 14.09   | 73.48   | 55.24   | 1.05    | 44.69  |
| <b>IL-1 ra</b>            | 1383.41 | 2576.04 | 261.51  | 313.84  | 214.32  | 53.05 | 188.64  | 357.56  | 332.90  | 1088.12 | 1125.66 | 1033.51 | 172.65  | 770.68 |
| <b>IL-1 sRI</b>           | 14.47   | 47.06   | 11.81   | 1.35    | 9.11    | 5.47  | 49.15   | 28.93   | 886.40  | 15.37   | 27.75   | 44.70   | 1.05    | 24.02  |
| <b>IL-1 sRII</b>          | 13.23   | 27.76   | 29.14   | 39.16   | 15.48   | 4.63  | 66.85   | 82.90   | 56.15   | 13.24   | 53.05   | 35.00   | 17.55   | 25.84  |
| <b>IL-2</b>               | 13.23   | 73.61   | 40.19   | 14.31   | 8.50    | 3.37  | 51.68   | 86.48   | 136.37  | 21.78   | 22.56   | 10.12   | 3.51    | 12.16  |
| <b>IL-2 R alpha</b>       | 1.65    | 18.91   | 9.55    | 10.53   | 5.77    | 1.68  | 50.95   | 15.21   | 16.04   | 4.70    | 92.69   | 15.60   | 7.72    | 41.95  |
| <b>IL-2 R beta /CD122</b> | 1.24    | 12.47   | 11.05   | 9.99    | 7.59    | 1.68  | 41.20   | 14.61   | 18.05   | 2.99    | 291.17  | 177.52  | 1.05    | 159.30 |
| <b>IL-2 R gamma</b>       | 12.81   | 29.36   | 12.31   | 10.80   | 14.57   | 1.26  | 36.86   | 21.47   | 19.55   | 14.52   | 145.13  | 113.85  | 1.05    | 92.72  |
| <b>IL-3</b>               | 64.07   | 35.80   | 176.35  | 165.56  | 125.38  | 4.21  | 118.53  | 205.77  | 243.66  | 102.07  | 132.93  | 91.50   | 6.32    | 100.33 |
| <b>IL-3 R alpha</b>       | 13.23   | 18.50   | 8.54    | 9.99    | 14.57   | 1.26  | 58.54   | 22.07   | 28.08   | 14.09   | 70.13   | 35.00   | 1.05    | 40.74  |
| <b>IL-4</b>               | 18.19   | 14.08   | 15.83   | 11.88   | 13.36   | 2.11  | 35.78   | 18.19   | 16.04   | 11.10   | 131.71  | 197.34  | 1.05    | 108.23 |
| <b>IL-4 R</b>             | 2444.00 | 2288.83 | 2984.58 | 2248.75 | 1808.08 | 1.26  | 3144.66 | 2874.22 | 3478.93 | 2891.98 | 275.01  | 1905.94 | 1527.92 | 756.09 |
| <b>IL-5</b>               | 35.96   | 35.40   | 44.21   | 21.07   | 31.27   | 1.26  | 49.87   | 78.73   | 79.21   | 27.76   | 35.06   | 48.49   | 1.05    | 28.27  |
| <b>IL-5 R alpha</b>       | 2.89    | 17.70   | 18.09   | 5.13    | 4.25    | 1.26  | 54.93   | 18.49   | 21.06   | 16.23   | 122.26  | 71.26   | 1.05    | 33.14  |
| <b>IL-6</b>               | 1.24    | 20.92   | 32.91   | 4.32    | 18.82   | 1.26  | 44.81   | 49.50   | 48.13   | 29.47   | 48.78   | 45.12   | 1.05    | 44.69  |
| <b>IL-6 R</b>             | 1.24    | 29.77   | 26.63   | 1.08    | 5.77    | 1.26  | 40.84   | 28.93   | 19.55   | 13.67   | 89.64   | 94.45   | 8.42    | 107.01 |
| <b>IL-7</b>               | 26.45   | 32.58   | 111.79  | 22.42   | 37.95   | 3.37  | 89.98   | 101.39  | 115.31  | 33.31   | 71.04   | 59.88   | 1.75    | 37.70  |
| <b>IL-7 R alpha</b>       | 23.97   | 42.64   | 10.80   | 10.26   | 12.75   | 1.26  | 38.67   | 25.05   | 21.06   | 14.09   | 185.98  | 140.42  | 2.11    | 132.55 |
| <b>IL-8</b>               | 395.97  | 637.57  | 602.14  | 516.95  | 795.97  | 2.95  | 215.74  | 352.19  | 474.79  | 294.24  | 53.66   | 39.22   | 48.08   | 32.53  |
| <b>IL-9</b>               | 8.68    | 15.29   | 11.05   | 13.50   | 15.48   | 1.26  | 44.09   | 11.63   | 16.54   | 14.95   | 44.51   | 21.51   | 1.05    | 28.27  |
| <b>IL-10</b>              | 7.85    | 12.87   | 16.58   | 11.88   | 3.95    | 1.26  | 42.64   | 26.54   | 21.06   | 13.67   | 66.47   | 43.01   | 2.81    | 28.88  |
| <b>IL-10 R alpha</b>      | 6.61    | 11.67   | 11.81   | 10.80   | 1.21    | 1.26  | 44.09   | 14.91   | 4.01    | 12.81   | 56.71   | 53.55   | 1.05    | 23.11  |
| <b>IL-10 R beta</b>       | 17.36   | 13.27   | 24.87   | 5.94    | 7.29    | 1.26  | 48.79   | 22.96   | 9.02    | 1.28    | 138.12  | 105.84  | 1.05    | 57.76  |
| <b>IL-11</b>              | 7.85    | 11.26   | 11.81   | 1.62    | 1.21    | 1.26  | 33.61   | 15.81   | 2.51    | 1.28    | 12.50   | 6.33    | 1.05    | 4.86   |
| <b>IL-12 p40</b>          | 3.72    | 23.33   | 25.37   | 0.81    | 5.77    | 1.26  | 39.03   | 29.23   | 1.50    | 1.28    | 46.34   | 39.22   | 1.05    | 41.65  |
| <b>IL-12 p70</b>          | 1.24    | 1.21    | 28.89   | 9.72    | 5.46    | 4.21  | 54.57   | 29.23   | 53.65   | 14.09   | 29.88   | 28.25   | 1.05    | 16.72  |
| <b>IL-12 R beta 1</b>     | 2.48    | 14.88   | 11.81   | 7.29    | 5.46    | 1.68  | 82.39   | 17.30   | 37.60   | 3.42    | 104.88  | 26.57   | 30.88   | 65.36  |

|                               |        |        |        |        |        |      |        |        |         |        |         |        |        |        |
|-------------------------------|--------|--------|--------|--------|--------|------|--------|--------|---------|--------|---------|--------|--------|--------|
| <b>IL-12 R beta 2</b>         | 63.65  | 9.65   | 9.04   | 10.26  | 1.52   | 1.26 | 44.45  | 31.61  | 15.04   | 11.96  | 68.91   | 24.88  | 1.05   | 26.75  |
| <b>IL-13</b>                  | 31.83  | 25.34  | 67.32  | 45.64  | 45.54  | 8.42 | 64.32  | 164.32 | 110.30  | 63.63  | 26.22   | 24.46  | 1.05   | 16.42  |
| <b>IL-13 R alpha 1</b>        | 23.15  | 7.24   | 12.56  | 13.77  | 10.63  | 3.37 | 53.84  | 17.30  | 23.56   | 17.94  | 160.68  | 110.06 | 24.21  | 76.00  |
| <b>IL-13 R alpha 2</b>        | 2.07   | 14.08  | 8.29   | 5.67   | 3.95   | 2.53 | 66.49  | 16.10  | 16.54   | 5.55   | 109.15  | 48.49  | 1.05   | 51.07  |
| <b>IL-15</b>                  | 10.33  | 51.49  | 27.38  | 15.40  | 17.61  | 5.89 | 89.98  | 73.66  | 167.45  | 20.50  | 18.60   | 5.90   | 1.05   | 11.55  |
| <b>IL-15 R alpha</b>          | 1.24   | 12.07  | 3.01   | 5.94   | 5.16   | 2.11 | 46.98  | 16.10  | 26.57   | 2.99   | 26.83   | 1.27   | 1.75   | 6.99   |
| <b>IL-16</b>                  | 2.07   | 13.27  | 13.82  | 11.07  | 1.21   | 1.26 | 44.09  | 19.09  | 21.56   | 8.54   | 27.44   | 9.28   | 1.05   | 18.24  |
| <b>IL-17</b>                  | 5.37   | 11.26  | 11.56  | 12.42  | 3.04   | 1.26 | 47.34  | 18.49  | 28.58   | 9.82   | 15.55   | 6.75   | 12.63  | 11.86  |
| <b>IL-17B</b>                 | 1.24   | 2.82   | 23.11  | 18.91  | 7.29   | 1.26 | 70.11  | 25.05  | 62.67   | 2.99   | 14.33   | 2.95   | 2.46   | 10.64  |
| <b>IL-17B R</b>               | 76.05  | 64.36  | 122.59 | 129.37 | 134.18 | 2.11 | 72.64  | 101.10 | 173.47  | 78.58  | 103.36  | 77.59  | 63.52  | 43.17  |
| <b>IL-17C</b>                 | 139.29 | 168.14 | 283.61 | 312.49 | 268.36 | 1.26 | 196.95 | 175.35 | 261.71  | 149.04 | 1094.26 | 511.90 | 108.08 | 616.54 |
| <b>IL-17D</b>                 | 23.97  | 14.48  | 10.05  | 17.29  | 13.36  | 1.26 | 47.70  | 31.01  | 24.07   | 17.08  | 145.74  | 136.62 | 6.67   | 70.23  |
| <b>IL-17E</b>                 | 19.43  | 45.05  | 19.59  | 12.15  | 14.27  | 1.26 | 58.54  | 23.86  | 23.06   | 19.22  | 226.84  | 141.26 | 1.05   | 104.89 |
| <b>IL-17F</b>                 | 85.15  | 64.76  | 122.84 | 77.25  | 91.98  | 1.26 | 103.35 | 84.10  | 117.82  | 99.08  | 586.92  | 909.54 | 1.05   | 169.95 |
| <b>IL-17R</b>                 | 21.49  | 32.58  | 29.89  | 13.77  | 19.13  | 1.26 | 37.58  | 50.10  | 45.12   | 20.07  | 43.60   | 44.28  | 5.61   | 13.68  |
| <b>IL-17RC</b>                | 35.96  | 15.69  | 6.78   | 9.45   | 8.20   | 1.26 | 38.31  | 34.89  | 21.06   | 19.22  | 73.78   | 35.84  | 3.86   | 18.24  |
| <b>IL-17RD</b>                | 83.91  | 16.09  | 2.01   | 9.72   | 6.68   | 1.26 | 37.22  | 26.84  | 17.55   | 6.83   | 72.26   | 34.58  | 3.51   | 29.19  |
| <b>IL-18 BPa</b>              | 15.29  | 18.10  | 0.75   | 9.99   | 3.04   | 1.26 | 52.40  | 1.79   | 65.18   | 1.28   | 178.06  | 87.29  | 2.46   | 73.88  |
| <b>IL-18 R alpha /IL-1 R5</b> | 11.99  | 12.87  | 10.80  | 8.91   | 10.63  | 1.26 | 44.09  | 14.61  | 14.54   | 11.10  | 40.55   | 26.57  | 1.05   | 20.37  |
| <b>IL-18 R beta /AcPL</b>     | 24.39  | 56.72  | 24.12  | 11.07  | 143.59 | 1.26 | 69.38  | 30.42  | 39.11   | 21.35  | 81.71   | 43.85  | 2.81   | 49.25  |
| <b>IL-19</b>                  | 303.80 | 581.26 | 806.62 | 367.32 | 657.84 | 1.26 | 264.16 | 376.95 | 545.98  | 172.10 | 57.01   | 37.95  | 36.15  | 31.92  |
| <b>IL-20</b>                  | 18.19  | 31.38  | 23.61  | 36.19  | 11.54  | 1.26 | 13.01  | 16.40  | 1001.71 | 2.99   | 87.50   | 47.65  | 1.05   | 34.35  |
| <b>IL-20 R alpha</b>          | 35.96  | 110.62 | 52.75  | 12.15  | 11.23  | 1.26 | 3.25   | 48.91  | 41.61   | 1.28   | 34.15   | 28.25  | 1.05   | 24.02  |
| <b>IL-20 R beta</b>           | 133.50 | 26.15  | 21.85  | 22.15  | 2.13   | 1.26 | 1.08   | 91.85  | 52.64   | 1.28   | 28.05   | 16.87  | 1.05   | 16.72  |
| <b>IL-21</b>                  | 2.89   | 12.87  | 3.01   | 0.81   | 0.91   | 1.26 | 21.68  | 3.58   | 15.54   | 1.28   | 7.01    | 7.59   | 12.28  | 7.90   |
| <b>IL-21 R</b>                | 3.31   | 27.76  | 3.27   | 2.70   | 4.86   | 1.26 | 58.18  | 5.67   | 22.06   | 3.84   | 193.91  | 16.87  | 1.05   | 78.74  |
| <b>IL-22</b>                  | 7.03   | 2.82   | 3.52   | 5.94   | 2.73   | 1.26 | 1.08   | 3.58   | 14.54   | 2.56   | 500.33  | 5.06   | 1.05   | 73.57  |

|                                 |         |        |         |         |         |      |         |        |         |        |        |        |        |        |
|---------------------------------|---------|--------|---------|---------|---------|------|---------|--------|---------|--------|--------|--------|--------|--------|
| <b>IL-22 BP</b>                 | 5.37    | 5.23   | 10.30   | 2.70    | 3.04    | 1.26 | 1.08    | 12.82  | 11.03   | 3.84   | 56.71  | 3.80   | 1.05   | 37.09  |
| <b>IL-22 R</b>                  | 1.24    | 2.82   | 7.28    | 3.51    | 4.55    | 1.26 | 1.08    | 4.77   | 18.05   | 1.28   | 16.16  | 1.69   | 1.05   | 10.64  |
| <b>IL-23</b>                    | 1313.14 | 359.21 | 3151.88 | 2669.82 | 2345.71 | 4.63 | 2297.97 | 340.27 | 1171.68 | 380.07 | 378.07 | 645.57 | 715.18 | 423.19 |
| <b>IL-23 R</b>                  | 15.71   | 22.93  | 12.81   | 9.99    | 11.84   | 1.26 | 58.54   | 14.02  | 18.05   | 12.81  | 18.90  | 1.27   | 1.05   | 9.42   |
| <b>IL-24</b>                    | 33.48   | 16.49  | 17.84   | 20.53   | 20.64   | 1.26 | 55.29   | 26.24  | 66.68   | 22.21  | 57.32  | 59.46  | 16.84  | 93.64  |
| <b>IL-26</b>                    | 13.64   | 6.03   | 3.27    | 3.78    | 0.91    | 1.26 | 1.08    | 2.09   | 9.02    | 4.27   | 46.34  | 18.98  | 1.05   | 25.23  |
| <b>IL-27</b>                    | 40.09   | 10.46  | 4.27    | 3.24    | 1.52    | 1.26 | 1.08    | 9.24   | 8.52    | 1.71   | 25.31  | 25.30  | 1.05   | 27.67  |
| <b>IL-28A</b>                   | 11.16   | 5.23   | 10.30   | 5.67    | 5.16    | 1.26 | 2.53    | 11.33  | 6.52    | 1.28   | 15.55  | 16.45  | 1.05   | 14.59  |
| <b>IL-29</b>                    | 27.28   | 2.82   | 30.14   | 33.22   | 22.77   | 1.26 | 9.40    | 12.82  | 20.05   | 1.28   | 137.51 | 73.79  | 277.23 | 60.80  |
| <b>IL-31</b>                    | 33.48   | 1.61   | 9.80    | 12.69   | 5.77    | 1.26 | 3.98    | 11.63  | 3.01    | 1.28   | 44.51  | 44.28  | 1.05   | 22.50  |
| <b>IL-31 RA</b>                 | 17.77   | 1.21   | 6.78    | 10.80   | 2.73    | 1.26 | 3.25    | 9.24   | 1.50    | 1.28   | 32.93  | 29.10  | 1.05   | 19.15  |
| <b>Inhibin A</b>                | 10.75   | 12.47  | 21.35   | 11.61   | 15.18   | 1.26 | 3.61    | 15.81  | 16.04   | 4.27   | 55.19  | 77.59  | 1.05   | 38.00  |
| <b>Inhibin B</b>                | 22.73   | 12.87  | 53.00   | 43.75   | 51.91   | 1.26 | 3.98    | 17.59  | 724.46  | 1.28   | 102.14 | 253.84 | 15.44  | 52.90  |
| <b>Insulin</b>                  | 52.49   | 46.66  | 91.19   | 41.32   | 12.45   | 1.26 | 2.53    | 93.64  | 38.10   | 1.28   | 33.84  | 35.42  | 1.05   | 20.98  |
| <b>Insulin R</b>                | 29.35   | 45.45  | 74.61   | 33.22   | 47.05   | 4.63 | 45.17   | 205.17 | 44.12   | 20.07  | 83.54  | 75.06  | 8.42   | 47.73  |
| <b>Insulysin / IDE</b>          | 20.67   | 12.47  | 9.29    | 10.26   | 10.32   | 1.26 | 57.82   | 16.40  | 4.01    | 2.99   | 20.12  | 1.27   | 4.91   | 11.86  |
| <b>IP-10</b>                    | 12.40   | 20.92  | 24.87   | 10.26   | 13.66   | 1.26 | 50.59   | 21.77  | 1.50    | 1.28   | 23.78  | 18.55  | 1.05   | 13.38  |
| <b>I-TAC / CXCL11</b>           | 54.97   | 32.18  | 165.54  | 86.43   | 111.11  | 1.26 | 104.44  | 82.01  | 299.81  | 48.68  | 545.45 | 607.20 | 38.60  | 304.32 |
| <b>Kininostatin / kininogen</b> | 22.32   | 22.12  | 33.41   | 30.52   | 23.07   | 1.26 | 36.50   | 24.45  | 38.10   | 24.77  | 79.58  | 98.67  | 3.86   | 50.16  |
| <b>Kremen-1</b>                 | 10.75   | 11.26  | 28.89   | 8.64    | 11.23   | 1.26 | 41.92   | 11.33  | 17.05   | 12.81  | 26.22  | 23.19  | 1.05   | 11.86  |
| <b>Kremen-2</b>                 | 1.24    | 8.45   | 4.02    | 4.05    | 2.43    | 1.26 | 1.08    | 13.42  | 7.52    | 2.56   | 15.55  | 6.33   | 1.05   | 8.82   |
| <b>Lck</b>                      | 1.24    | 11.26  | 6.53    | 6.48    | 3.34    | 1.26 | 14.45   | 7.16   | 3.51    | 1.28   | 5.79   | 3.37   | 1.05   | 7.30   |
| <b>Latent TGF-beta bp1</b>      | 2.07    | 90.51  | 4.52    | 3.24    | 1.82    | 1.26 | 1.08    | 8.35   | 1.50    | 1.28   | 6.71   | 5.06   | 1.05   | 6.08   |
| <b>LBP</b>                      | 34.31   | 18.50  | 15.32   | 15.40   | 13.05   | 2.11 | 18.79   | 37.87  | 27.57   | 6.83   | 89.64  | 74.21  | 6.32   | 64.15  |
| <b>LECT2</b>                    | 35.13   | 8.85   | 7.79    | 4.32    | 3.34    | 1.26 | 18.07   | 24.16  | 10.03   | 1.28   | 36.59  | 5.48   | 1.05   | 30.40  |
| <b>Lefty - A</b>                | 14.05   | 13.68  | 8.29    | 9.72    | 1.82    | 1.26 | 49.87   | 10.74  | 14.04   | 10.68  | 3.05   | 1.27   | 1.05   | 2.43   |
| <b>Leptin R</b>                 | 164.92  | 88.50  | 39.19   | 81.03   | 61.32   | 1.26 | 117.45  | 116.60 | 206.06  | 106.34 | 365.87 | 112.59 | 129.84 | 355.39 |



|                                     |        |        |        |        |       |      |        |        |        |        |        |        |        |        |
|-------------------------------------|--------|--------|--------|--------|-------|------|--------|--------|--------|--------|--------|--------|--------|--------|
| <b>Leptin (OB)</b>                  | 11.16  | 12.47  | 9.80   | 10.80  | 3.04  | 1.26 | 44.45  | 74.85  | 247.17 | 23.49  | 2.74   | 3.80   | 1.05   | 3.95   |
| <b>LFA-1 alpha</b>                  | 98.37  | 32.58  | 85.41  | 37.27  | 7.59  | 1.68 | 45.17  | 64.41  | 77.71  | 22.63  | 93.91  | 54.40  | 84.92  | 110.05 |
| <b>LIF</b>                          | 26.04  | 11.67  | 10.80  | 12.69  | 5.77  | 1.26 | 3.98   | 17.89  | 22.06  | 4.27   | 51.53  | 48.91  | 1.05   | 47.43  |
| <b>LIF R alpha</b>                  | 46.71  | 16.49  | 32.66  | 22.42  | 17.00 | 1.26 | 27.46  | 36.98  | 194.03 | 1.71   | 37.81  | 32.05  | 29.83  | 22.19  |
| <b>LIGHT / TNFSF14</b>              | 16.12  | 17.70  | 19.85  | 9.45   | 12.75 | 1.26 | 1.08   | 26.24  | 21.06  | 11.96  | 42.68  | 49.76  | 1.05   | 29.19  |
| <b>Lipocalin-1</b>                  | 220.72 | 66.37  | 211.01 | 137.75 | 75.29 | 1.26 | 216.82 | 222.77 | 614.16 | 99.50  | 212.20 | 315.41 | 629.91 | 192.75 |
| <b>LRP-1</b>                        | 35.96  | 11.67  | 9.04   | 10.26  | 12.75 | 1.26 | 23.13  | 27.44  | 16.04  | 11.10  | 124.09 | 104.57 | 1.05   | 86.64  |
| <b>LRP-6</b>                        | 44.64  | 3.22   | 7.54   | 9.72   | 9.11  | 1.26 | 5.42   | 25.05  | 17.55  | 2.99   | 85.67  | 43.43  | 1.05   | 117.35 |
| <b>L-Selectin (CD62L)</b>           | 1.24   | 1.21   | 0.75   | 0.81   | 3.64  | 1.26 | 1.08   | 0.89   | 1.50   | 1.28   | 53.97  | 40.06  | 2.11   | 42.26  |
| <b>Luciferase</b>                   | 33.89  | 1.21   | 23.36  | 22.42  | 44.63 | 1.26 | 12.65  | 222.17 | 65.68  | 1.28   | 214.03 | 99.94  | 80.71  | 218.89 |
| <b>Lymphotactin / XCL1</b>          | 4.13   | 6.84   | 6.78   | 5.94   | 8.20  | 1.26 | 20.96  | 11.93  | 14.54  | 3.42   | 49.09  | 57.35  | 1.05   | 40.43  |
| <b>Lymphotoxin beta / TNFSF3</b>    | 1.24   | 2.41   | 4.27   | 4.05   | 11.23 | 1.26 | 9.40   | 8.05   | 4.01   | 1.28   | 65.25  | 145.90 | 24.21  | 65.97  |
| <b>Lymphotoxin beta R / TNFRSF3</b> | 1.24   | 1.21   | 6.03   | 1.08   | 2.73  | 1.26 | 5.78   | 7.16   | 1.50   | 1.28   | 62.81  | 77.17  | 1.05   | 44.69  |
| <b>MAC-1</b>                        | 2.89   | 9.25   | 14.82  | 11.34  | 6.07  | 2.53 | 7.95   | 15.51  | 26.07  | 3.42   | 28.66  | 13.92  | 1.05   | 15.81  |
| <b>MCP-1</b>                        | 1.24   | 8.45   | 42.71  | 10.26  | 13.05 | 1.26 | 21.68  | 156.86 | 79.21  | 1.28   | 25.92  | 17.71  | 2.11   | 12.46  |
| <b>MCP-2</b>                        | 1.24   | 1.21   | 10.80  | 1.62   | 4.25  | 1.26 | 5.06   | 13.42  | 56.65  | 1.28   | 54.27  | 1.27   | 1.05   | 22.50  |
| <b>MCP-3</b>                        | 13.23  | 10.86  | 8.79   | 11.34  | 4.25  | 1.26 | 10.48  | 14.02  | 33.09  | 15.37  | 324.40 | 374.44 | 23.86  | 207.95 |
| <b>MCP-4 / CCL13</b>                | 11.99  | 9.65   | 8.29   | 11.07  | 2.73  | 1.26 | 11.20  | 12.53  | 16.04  | 8.54   | 100.00 | 56.93  | 1.05   | 45.60  |
| <b>M-CSF</b>                        | 81.01  | 63.56  | 95.71  | 44.56  | 7.59  | 1.26 | 1.08   | 90.66  | 161.44 | 114.45 | 188.73 | 194.39 | 105.98 | 113.70 |
| <b>M-CSF R</b>                      | 19.84  | 29.77  | 33.66  | 10.53  | 13.36 | 1.26 | 15.90  | 32.51  | 27.57  | 23.06  | 27.75  | 24.04  | 1.05   | 16.11  |
| <b>MDC</b>                          | 31.83  | 26.95  | 59.54  | 54.29  | 50.70 | 1.26 | 24.57  | 172.97 | 271.74 | 70.89  | 742.41 | 366.43 | 76.50  | 358.44 |
| <b>MFG-E8</b>                       | 17.77  | 13.27  | 12.56  | 8.37   | 12.14 | 1.26 | 1.08   | 14.02  | 28.58  | 13.24  | 953.09 | 30.78  | 1.05   | 20.07  |
| <b>MFRP</b>                         | 10.75  | 12.47  | 9.04   | 3.51   | 2.43  | 1.68 | 73.36  | 14.61  | 14.04  | 2.56   | 40.25  | 51.44  | 1.05   | 39.83  |
| <b>MIF</b>                          | 13.64  | 17.70  | 31.90  | 8.91   | 8.50  | 2.95 | 59.27  | 31.31  | 35.10  | 8.54   | 16.16  | 21.51  | 1.05   | 13.07  |
| <b>MIG</b>                          | 31.41  | 30.17  | 51.25  | 13.50  | 17.91 | 5.47 | 72.27  | 212.63 | 119.32 | 4.70   | 32.62  | 28.25  | 10.18  | 11.86  |
| <b>MIP-1a</b>                       | 364.14 | 108.61 | 66.32  | 70.22  | 77.71 | 4.21 | 105.88 | 201.89 | 167.45 | 162.71 | 128.97 | 169.93 | 457.25 | 85.73  |

|                              |        |       |       |       |       |      |       |       |        |       |        |        |       |        |
|------------------------------|--------|-------|-------|-------|-------|------|-------|-------|--------|-------|--------|--------|-------|--------|
| <b>MIP-1b</b>                | 30.17  | 12.87 | 15.07 | 15.12 | 20.34 | 2.11 | 54.21 | 20.58 | 46.13  | 21.35 | 21.95  | 8.86   | 1.05  | 21.89  |
| <b>MIP-1d</b>                | 7.85   | 10.86 | 8.04  | 8.10  | 14.57 | 1.26 | 32.88 | 10.14 | 9.53   | 13.24 | 41.47  | 44.70  | 1.05  | 27.97  |
| <b>MIP 2</b>                 | 21.91  | 12.47 | 8.04  | 8.10  | 1.21  | 2.11 | 7.23  | 6.56  | 7.52   | 5.55  | 34.76  | 16.45  | 1.05  | 27.97  |
| <b>MIP-3 alpha</b>           | 97.13  | 12.87 | 8.04  | 10.53 | 6.38  | 1.26 | 17.35 | 14.31 | 7.52   | 3.42  | 171.35 | 223.48 | 1.05  | 140.46 |
| <b>MIP-3 beta</b>            | 40.51  | 12.47 | 5.28  | 4.86  | 4.55  | 1.26 | 10.48 | 22.07 | 6.52   | 1.28  | 41.47  | 59.88  | 1.05  | 33.44  |
| <b>MMP-1</b>                 | 2.48   | 4.83  | 6.78  | 2.70  | 0.91  | 1.26 | 2.17  | 1.79  | 17.05  | 3.84  | 22.56  | 72.53  | 1.05  | 39.52  |
| <b>MMP-2</b>                 | 11.57  | 9.25  | 11.30 | 8.91  | 6.07  | 1.68 | 20.96 | 10.44 | 35.60  | 5.55  | 75.92  | 72.53  | 1.05  | 83.30  |
| <b>MMP-3</b>                 | 7.03   | 5.23  | 10.30 | 4.59  | 9.11  | 1.26 | 9.40  | 15.51 | 16.54  | 2.56  | 80.49  | 46.81  | 1.05  | 70.53  |
| <b>MMP-7</b>                 | 30.17  | 13.27 | 28.39 | 11.88 | 2.73  | 2.11 | 5.42  | 5.67  | 150.41 | 9.40  | 27.14  | 12.23  | 4.91  | 15.50  |
| <b>MMP-8</b>                 | 33.07  | 13.68 | 23.86 | 17.02 | 14.57 | 1.26 | 33.61 | 24.75 | 165.95 | 8.97  | 37.20  | 27.41  | 1.05  | 22.50  |
| <b>MMP-9</b>                 | 13.23  | 2.41  | 10.30 | 4.59  | 2.13  | 1.26 | 20.60 | 17.89 | 29.08  | 1.28  | 16.46  | 1.27   | 1.05  | 17.02  |
| <b>MMP-10</b>                | 25.63  | 10.06 | 6.28  | 9.18  | 11.54 | 1.26 | 63.24 | 14.61 | 12.03  | 3.42  | 33.84  | 37.95  | 2.46  | 29.49  |
| <b>MMP-11 /Stromelysin-3</b> | 13.23  | 4.42  | 4.52  | 3.24  | 5.16  | 1.26 | 59.99 | 9.84  | 3.51   | 1.28  | 23.48  | 13.07  | 3.51  | 17.33  |
| <b>MMP-12</b>                | 14.47  | 1.21  | 3.01  | 0.81  | 5.46  | 1.26 | 56.74 | 4.77  | 1.50   | 1.28  | 23.78  | 34.16  | 1.05  | 16.11  |
| <b>MMP-13</b>                | 9.09   | 22.93 | 11.05 | 10.53 | 7.89  | 1.26 | 22.77 | 34.89 | 46.13  | 3.42  | 47.87  | 75.48  | 1.05  | 36.79  |
| <b>MMP-14</b>                | 2.89   | 29.36 | 19.59 | 4.59  | 10.63 | 1.26 | 2.17  | 25.65 | 319.87 | 1.28  | 28.05  | 27.83  | 1.05  | 18.54  |
| <b>MMP-15</b>                | 1.24   | 13.68 | 4.27  | 1.89  | 6.98  | 1.26 | 2.53  | 15.21 | 186.51 | 1.28  | 108.24 | 125.24 | 1.05  | 77.52  |
| <b>MMP-16 / MT3-MMP</b>      | 36.79  | 12.47 | 5.78  | 8.37  | 1.52  | 1.68 | 29.63 | 25.05 | 15.54  | 2.99  | 96.96  | 102.04 | 1.05  | 72.96  |
| <b>MMP-19</b>                | 54.15  | 22.93 | 14.57 | 19.18 | 21.25 | 1.26 | 44.09 | 25.65 | 61.17  | 1.28  | 147.26 | 99.94  | 2.11  | 90.60  |
| <b>MMP-20</b>                | 47.53  | 25.74 | 19.85 | 25.66 | 30.96 | 7.58 | 18.79 | 25.65 | 64.17  | 1.28  | 196.35 | 96.56  | 5.26  | 97.89  |
| <b>MMP-24 / MT5-MMP</b>      | 27.28  | 10.06 | 17.33 | 14.58 | 4.25  | 1.26 | 13.01 | 27.14 | 40.61  | 5.12  | 41.77  | 48.49  | 1.05  | 23.11  |
| <b>MMP-25 / MT6-MMP</b>      | 13.64  | 1.21  | 8.29  | 11.07 | 2.13  | 1.26 | 7.95  | 9.54  | 15.04  | 1.28  | 9.15   | 6.75   | 1.05  | 7.90   |
| <b>Musk</b>                  | 42.99  | 1.21  | 30.65 | 16.48 | 4.86  | 1.26 | 6.14  | 38.17 | 56.65  | 1.28  | 34.76  | 28.67  | 1.05  | 17.63  |
| <b>MSP alpha Chain</b>       | 33.07  | 35.40 | 35.42 | 12.42 | 4.55  | 1.26 | 37.94 | 41.45 | 70.19  | 3.84  | 58.54  | 97.83  | 1.05  | 50.77  |
| <b>MSP beta-chain</b>        | 25.63  | 13.27 | 15.07 | 6.75  | 16.70 | 1.26 | 1.81  | 16.40 | 70.69  | 1.28  | 22.26  | 13.49  | 14.74 | 10.03  |
| <b>NAP-2</b>                 | 11.99  | 23.33 | 22.36 | 0.81  | 2.73  | 1.26 | 1.45  | 25.94 | 28.58  | 1.28  | 38.42  | 35.84  | 1.05  | 28.88  |
| <b>NCAM-1 / CD56</b>         | 128.96 | 16.89 | 17.58 | 10.26 | 3.95  | 1.68 | 14.09 | 46.52 | 22.06  | 7.69  | 107.32 | 85.18  | 5.26  | 52.29  |

|                                    |        |        |        |         |        |       |        |         |         |        |         |         |         |        |
|------------------------------------|--------|--------|--------|---------|--------|-------|--------|---------|---------|--------|---------|---------|---------|--------|
| <b>Neuritin</b>                    | 22.73  | 10.06  | 12.81  | 8.37    | 14.27  | 3.37  | 1.08   | 12.23   | 350.95  | 5.98   | 18.29   | 10.12   | 6.67    | 13.07  |
| <b>NeuroD1</b>                     | 88.45  | 10.86  | 9.55   | 4.05    | 5.77   | 1.26  | 1.08   | 37.58   | 16.04   | 1.71   | 94.52   | 56.50   | 1.05    | 33.75  |
| <b>Neuropilin-2</b>                | 6.20   | 8.85   | 11.30  | 4.32    | 3.04   | 1.68  | 1.08   | 14.02   | 16.04   | 3.84   | 91.77   | 130.30  | 2.46    | 48.64  |
| <b>Neurturin</b>                   | 22.73  | 28.56  | 132.64 | 25.66   | 20.64  | 3.37  | 7.23   | 38.47   | 195.53  | 20.07  | 36.59   | 72.11   | 33.34   | 32.53  |
| <b>NGF R</b>                       | 2.48   | 12.87  | 20.85  | 7.56    | 7.89   | 1.26  | 1.08   | 14.31   | 18.05   | 3.42   | 30.18   | 39.64   | 13.69   | 33.44  |
| <b>NOV / CCN3</b>                  | 20.67  | 19.71  | 13.31  | 0.81    | 0.91   | 1.26  | 1.08   | 19.09   | 5.51    | 3.84   | 56.40   | 43.43   | 1.05    | 53.20  |
| <b>NRG1 Isoform GGF2</b>           | 191.37 | 13.27  | 14.57  | 6.21    | 2.73   | 1.26  | 1.08   | 76.94   | 15.04   | 5.98   | 68.30   | 55.66   | 1.05    | 43.47  |
| <b>NRG1-alpha / HRG1-alpha</b>     | 92.17  | 15.29  | 12.56  | 5.40    | 3.04   | 1.26  | 1.08   | 63.22   | 26.07   | 5.55   | 38.72   | 25.30   | 2.81    | 27.36  |
| <b>NRG1-beta1 / HRG1-beta1</b>     | 19.43  | 28.16  | 30.65  | 9.18    | 5.77   | 1.26  | 160.81 | 24.45   | 36.10   | 21.78  | 9.76    | 5.90    | 2.81    | 13.98  |
| <b>NRG2</b>                        | 601.39 | 69.99  | 353.70 | 291.97  | 412.86 | 16.42 | 284.40 | 262.73  | 1128.06 | 347.62 | 90.25   | 22.77   | 7.72    | 25.84  |
| <b>NRG3</b>                        | 108.71 | 64.36  | 42.20  | 33.22   | 33.70  | 2.53  | 130.82 | 41.75   | 86.23   | 67.47  | 30.49   | 17.29   | 10.53   | 21.59  |
| <b>NT-3</b>                        | 20.25  | 24.54  | 21.85  | 4.32    | 15.18  | 1.26  | 1.08   | 15.51   | 18.55   | 3.84   | 37.50   | 32.05   | 1.05    | 17.94  |
| <b>NT-4</b>                        | 91.76  | 30.97  | 18.84  | 23.77   | 31.27  | 1.26  | 18.43  | 84.99   | 145.90  | 19.22  | 37.50   | 2.11    | 4.91    | 16.42  |
| <b>Orexin A</b>                    | 15.71  | 6.44   | 30.90  | 7.56    | 14.57  | 1.26  | 1.08   | 14.02   | 18.05   | 2.56   | 32.62   | 29.52   | 1.05    | 23.41  |
| <b>Orexin B</b>                    | 13.23  | 1.21   | 10.30  | 11.61   | 10.32  | 1.26  | 54.93  | 9.84    | 9.53    | 9.82   | 0.91    | 1.27    | 1.05    | 0.91   |
| <b>OSM</b>                         | 147.14 | 1.21   | 406.45 | 135.31  | 98.05  | 1.26  | 166.59 | 174.16  | 346.44  | 337.80 | 243.61  | 422.93  | 611.66  | 122.82 |
| <b>Osteoactivin / GPNMB</b>        | 22.32  | 1.21   | 40.95  | 16.48   | 15.48  | 1.26  | 61.07  | 78.73   | 127.85  | 79.43  | 44.21   | 70.42   | 116.51  | 25.54  |
| <b>Osteocrin</b>                   | 133.09 | 13.27  | 9.29   | 11.61   | 12.75  | 1.26  | 85.28  | 34.59   | 20.56   | 11.96  | 52.44   | 38.37   | 1.05    | 49.55  |
| <b>Osteoprotegerin / TNFRSF11B</b> | 633.63 | 802.10 | 565.97 | 1049.83 | 923.77 | 1.26  | 520.01 | 2211.28 | 947.07  | 842.57 | 1120.78 | 2132.80 | 2747.03 | 966.47 |
| <b>OX40 Ligand / TNFSF4</b>        | 13.64  | 14.88  | 31.40  | 17.56   | 27.93  | 1.26  | 64.32  | 60.84   | 61.17   | 20.07  | 155.49  | 180.90  | 8.42    | 100.63 |
| <b>PARC / CCL18</b>                | 4.13   | 10.86  | 12.81  | 8.91    | 7.89   | 1.26  | 10.48  | 14.31   | 16.54   | 2.14   | 98.48   | 59.46   | 1.05    | 65.06  |
| <b>PD-ECGF</b>                     | 1.24   | 5.23   | 11.05  | 4.05    | 2.73   | 6.74  | 10.12  | 14.31   | 5.51    | 1.28   | 26.53   | 23.19   | 1.05    | 86.04  |
| <b>PDGF R alpha</b>                | 1.65   | 1.21   | 15.57  | 3.51    | 1.21   | 1.26  | 10.12  | 5.07    | 9.53    | 1.28   | 5.79    | 3.80    | 1.05    | 4.56   |
| <b>PDGF R beta</b>                 | 16.12  | 46.26  | 35.17  | 11.88   | 7.59   | 1.26  | 39.75  | 39.07   | 40.11   | 6.41   | 60.06   | 53.97   | 1.05    | 37.09  |
| <b>PDGF-AA</b>                     | 5.37   | 17.30  | 10.80  | 31.87   | 3.34   | 1.26  | 16.62  | 32.51   | 20.05   | 1.28   | 67.99   | 24.04   | 1.05    | 59.89  |
| <b>PDGF-AB</b>                     | 1.24   | 21.72  | 24.37  | 1.89    | 6.07   | 1.26  | 1.08   | 46.22   | 134.87  | 1.28   | 48.48   | 23.19   | 1.05    | 29.19  |

|                            |        |       |        |       |        |      |        |        |         |       |        |        |         |        |
|----------------------------|--------|-------|--------|-------|--------|------|--------|--------|---------|-------|--------|--------|---------|--------|
| <b>PDGF-BB</b>             | 23.56  | 10.86 | 12.31  | 9.99  | 5.46   | 1.26 | 53.12  | 22.66  | 23.06   | 3.84  | 67.38  | 24.04  | 1.05    | 36.79  |
| <b>PDGF-C</b>              | 35.96  | 3.22  | 8.54   | 4.86  | 3.64   | 1.26 | 6.87   | 18.79  | 5.51    | 1.28  | 96.04  | 24.04  | 1.05    | 35.87  |
| <b>PDGF-D</b>              | 16.12  | 1.21  | 7.28   | 1.08  | 2.43   | 1.26 | 1.08   | 3.58   | 1.50    | 1.28  | 8.84   | 2.53   | 1.05    | 5.47   |
| <b>PECAM-1 /CD31</b>       | 21.91  | 9.25  | 53.26  | 95.61 | 117.48 | 2.11 | 1.08   | 16.70  | 10.53   | 5.12  | 26.83  | 41.75  | 1.75    | 15.20  |
| <b>Pentraxin3 / TSG-14</b> | 160.78 | 7.24  | 9.04   | 9.72  | 15.18  | 1.26 | 1.08   | 50.10  | 9.53    | 2.99  | 70.43  | 34.16  | 1.05    | 37.39  |
| <b>Persephin</b>           | 26.87  | 8.45  | 14.57  | 10.26 | 13.36  | 1.26 | 2.53   | 17.89  | 4.51    | 3.42  | 16.16  | 3.80   | 1.05    | 7.90   |
| <b>PF4 / CXCL4</b>         | 10.75  | 6.03  | 7.28   | 25.93 | 0.91   | 3.79 | 1.81   | 30.42  | 95.76   | 14.09 | 47.87  | 14.76  | 4.56    | 47.73  |
| <b>PIGF</b>                | 3.72   | 13.68 | 16.58  | 12.15 | 4.25   | 3.37 | 1.08   | 15.21  | 16.54   | 5.12  | 22.56  | 35.84  | 1.05    | 16.72  |
| <b>PLUNC</b>               | 2.48   | 4.83  | 17.08  | 9.45  | 4.86   | 1.26 | 1.08   | 11.33  | 11.03   | 2.99  | 15.85  | 16.02  | 1.75    | 9.42   |
| <b>Pref-1</b>              | 7.44   | 10.86 | 14.32  | 8.10  | 0.91   | 1.26 | 1.08   | 14.31  | 13.04   | 11.96 | 60.67  | 89.39  | 1.05    | 38.61  |
| <b>Progranulin</b>         | 7.85   | 6.03  | 11.56  | 6.48  | 1.82   | 1.26 | 1.08   | 22.07  | 6.02    | 5.12  | 5.18   | 2.11   | 1.05    | 3.04   |
| <b>Prolactin</b>           | 3.31   | 11.67 | 25.87  | 5.40  | 2.43   | 1.26 | 1.08   | 22.37  | 13.54   | 5.12  | 45.43  | 58.19  | 1.05    | 31.31  |
| <b>P-selectin</b>          | 122.76 | 28.96 | 34.42  | 27.82 | 0.91   | 1.68 | 16.26  | 121.97 | 62.67   | 38.86 | 78.36  | 53.13  | 1.75    | 48.64  |
| <b>RAGE</b>                | 69.44  | 41.03 | 32.41  | 15.40 | 5.77   | 2.11 | 1.08   | 59.35  | 244.66  | 17.08 | 101.53 | 146.74 | 1.75    | 72.36  |
| <b>RANK / TNFRSF11A</b>    | 18.19  | 15.69 | 13.06  | 14.85 | 7.59   | 2.11 | 7.23   | 34.59  | 110.30  | 9.82  | 61.59  | 55.66  | 1.05    | 35.87  |
| <b>RANTES</b>              | 30.17  | 34.19 | 18.34  | 15.94 | 11.23  | 1.26 | 1.08   | 22.96  | 36.10   | 15.80 | 97.57  | 51.02  | 1.05    | 57.46  |
| <b>RELM beta</b>           | 13.23  | 11.26 | 10.80  | 10.26 | 12.14  | 1.26 | 1.08   | 13.12  | 16.54   | 4.70  | 57.01  | 18.55  | 1.05    | 47.73  |
| <b>RELT / TNFRSF19L</b>    | 52.08  | 26.55 | 24.87  | 27.01 | 32.18  | 1.26 | 6.14   | 33.40  | 77.71   | 2.99  | 27.44  | 26.57  | 1.05    | 23.71  |
| <b>ROBO4</b>               | 1.24   | 3.22  | 17.84  | 18.37 | 11.54  | 1.26 | 139.13 | 9.54   | 49.13   | 6.83  | 157.93 | 308.24 | 1374.22 | 132.25 |
| <b>S100 A8/A9</b>          | 4.13   | 14.08 | 24.12  | 14.85 | 48.27  | 4.63 | 138.04 | 41.15  | 55.15   | 1.28  | 65.86  | 42.17  | 103.17  | 51.07  |
| <b>S100A10</b>             | 1.24   | 1.21  | 14.07  | 19.72 | 31.88  | 1.26 | 169.84 | 3.28   | 21.06   | 1.28  | 8.23   | 5.90   | 3.16    | 5.17   |
| <b>SAA</b>                 | 8.27   | 11.26 | 20.85  | 23.23 | 336.36 | 1.68 | 1.08   | 71.27  | 188.51  | 5.98  | 47.26  | 28.25  | 38.25   | 19.46  |
| <b>SCF</b>                 | 1.24   | 1.21  | 13.82  | 13.77 | 15.48  | 1.26 | 28.19  | 40.26  | 44.62   | 1.28  | 50.31  | 56.50  | 1.05    | 34.96  |
| <b>SCF R/CD117</b>         | 1.24   | 1.21  | 2.26   | 13.50 | 13.36  | 1.26 | 30.72  | 22.37  | 21.06   | 1.28  | 126.53 | 110.48 | 1.05    | 80.26  |
| <b>SDF-1 / CXCL12</b>      | 1.24   | 6.84  | 10.05  | 9.99  | 10.93  | 1.26 | 22.04  | 12.82  | 18.05   | 14.09 | 75.92  | 32.05  | 1.05    | 75.40  |
| <b>sFRP-1</b>              | 64.89  | 18.50 | 11.81  | 11.07 | 16.70  | 1.26 | 7.59   | 21.77  | 35.10   | 13.24 | 17.68  | 13.07  | 3.16    | 7.60   |
| <b>sFRP-3</b>              | 293.46 | 82.86 | 114.80 | 94.53 | 424.09 | 1.26 | 1.08   | 161.34 | 1073.91 | 73.45 | 73.78  | 91.92  | 1.05    | 63.24  |

|                                        |         |         |         |         |         |      |         |         |         |         |         |         |        |         |
|----------------------------------------|---------|---------|---------|---------|---------|------|---------|---------|---------|---------|---------|---------|--------|---------|
| <b>sFRP-4</b>                          | 23.56   | 12.07   | 12.31   | 14.31   | 16.39   | 1.26 | 66.85   | 13.72   | 20.56   | 14.95   | 19.21   | 9.28    | 1.05   | 9.73    |
| <b>sgp130</b>                          | 39.27   | 29.77   | 30.90   | 76.16   | 82.27   | 1.26 | 79.86   | 65.31   | 80.22   | 55.09   | 54.88   | 45.12   | 1.05   | 45.30   |
| <b>SIGIRR</b>                          | 4701.60 | 5483.14 | 1991.81 | 3195.14 | 3858.11 | 1.26 | 6634.43 | 5739.19 | 7120.30 | 9644.50 | 1714.10 | 1448.43 | 739.40 | 1684.55 |
| <b>Siglec-5/CD170</b>                  | 1.24    | 1.21    | 10.30   | 11.34   | 12.45   | 1.26 | 66.49   | 13.42   | 15.04   | 14.95   | 17.38   | 7.59    | 1.05   | 14.29   |
| <b>Siglec-9</b>                        | 1.24    | 1.21    | 166.30  | 412.96  | 402.23  | 1.26 | 214.66  | 301.80  | 265.22  | 241.28  | 789.97  | 579.37  | 86.33  | 571.55  |
| <b>SLPI</b>                            | 1.24    | 1.21    | 8.29    | 9.45    | 13.96   | 1.26 | 47.34   | 15.21   | 17.55   | 14.95   | 7.62    | 1.69    | 1.05   | 6.99    |
| <b>Smad 1</b>                          | 52.08   | 1.21    | 0.75    | 8.91    | 1.52    | 1.26 | 1.08    | 29.52   | 2.01    | 1.71    | 1.83    | 1.27    | 1.05   | 0.91    |
| <b>Smad 4</b>                          | 14.05   | 1.21    | 0.75    | 31.06   | 6.38    | 1.26 | 13.37   | 13.72   | 5.51    | 3.84    | 0.91    | 1.27    | 1.05   | 0.91    |
| <b>Smad 5</b>                          | 33.89   | 1.21    | 2.76    | 16.21   | 9.41    | 1.26 | 29.27   | 17.30   | 5.51    | 4.27    | 4.88    | 3.37    | 1.05   | 31.31   |
| <b>Smad 7</b>                          | 38.44   | 16.09   | 18.84   | 19.45   | 23.68   | 1.26 | 10.84   | 18.19   | 18.05   | 5.12    | 45.73   | 84.33   | 5.26   | 69.32   |
| <b>Smad 8</b>                          | 291.40  | 79.65   | 60.04   | 51.86   | 126.59  | 8.00 | 1.08    | 24.75   | 19.55   | 7.26    | 50.31   | 56.93   | 9.47   | 102.15  |
| <b>SMDF / NRG1Isoform</b>              | 18.19   | 13.68   | 14.07   | 14.04   | 21.55   | 1.26 | 1.08    | 19.98   | 27.07   | 3.84    | 2.44    | 7.17    | 1.05   | 5.17    |
| <b>Soggy-1</b>                         | 16.95   | 20.92   | 4.77    | 4.32    | 2.73    | 1.68 | 1.08    | 22.96   | 18.55   | 2.99    | 24.70   | 35.42   | 1.05   | 56.85   |
| <b>Sonic Hedgehog (Shh N-terminal)</b> | 18.19   | 24.94   | 6.78    | 6.48    | 2.73    | 1.68 | 1.08    | 21.17   | 29.08   | 1.71    | 9.76    | 40.06   | 1.05   | 21.59   |
| <b>SPARC</b>                           | 37.61   | 13.27   | 5.53    | 4.86    | 2.73    | 1.26 | 1.08    | 20.58   | 13.04   | 3.84    | 10.06   | 1.27    | 1.05   | 15.81   |
| <b>Spinesin</b>                        | 30.17   | 4.42    | 10.55   | 1.08    | 0.91    | 1.26 | 1.08    | 18.79   | 20.05   | 5.55    | 3.96    | 1.27    | 1.05   | 8.21    |
| <b>TACI / TNFRSF13B</b>                | 23.97   | 9.25    | 28.64   | 7.02    | 3.04    | 4.63 | 1.08    | 21.77   | 73.20   | 11.10   | 87.81   | 159.81  | 12.98  | 84.52   |
| <b>Tarc</b>                            | 12.81   | 5.63    | 9.55    | 4.59    | 6.38    | 1.68 | 10.84   | 115.41  | 692.38  | 35.02   | 163.42  | 116.38  | 1.05   | 65.36   |
| <b>TCCR / WSX-1</b>                    | 46.71   | 6.44    | 21.10   | 19.72   | 0.91    | 1.26 | 25.66   | 0.89    | 2.51    | 7.26    | 75.00   | 118.07  | 1.05   | 121.61  |
| <b>TECK / CCL25</b>                    | 12.81   | 12.47   | 11.30   | 11.34   | 0.91    | 1.26 | 1.08    | 1.79    | 5.01    | 2.99    | 40.25   | 3.80    | 1.05   | 44.39   |
| <b>TFPI</b>                            | 16.12   | 3.62    | 9.80    | 10.53   | 0.91    | 1.26 | 1.08    | 5.37    | 4.51    | 4.27    | 6.40    | 1.27    | 1.05   | 3.95    |
| <b>TGF-alpha</b>                       | 47.53   | 15.29   | 12.06   | 12.96   | 5.77    | 1.26 | 1.08    | 26.54   | 19.55   | 1.28    | 85.37   | 86.44   | 4.91   | 50.16   |
| <b>TGF-beta 1</b>                      | 24.80   | 28.16   | 35.42   | 26.20   | 4.25    | 1.26 | 1.08    | 59.94   | 47.13   | 1.28    | 59.76   | 89.39   | 23.16  | 51.68   |
| <b>TGF-beta 2</b>                      | 20.25   | 14.48   | 32.91   | 22.96   | 15.79   | 1.26 | 1.08    | 15.51   | 41.11   | 1.28    | 54.88   | 63.25   | 1.05   | 67.49   |
| <b>TGF-beta 3</b>                      | 22.32   | 47.06   | 33.41   | 11.34   | 2.73    | 1.26 | 1.08    | 36.08   | 41.61   | 14.95   | 60.67   | 72.11   | 1.05   | 55.94   |
| <b>TGF-beta 5</b>                      | 125.24  | 23.33   | 17.58   | 16.21   | 15.79   | 1.26 | 1.08    | 96.32   | 29.58   | 16.23   | 79.58   | 136.20  | 36.85  | 73.57   |

|                               |         |         |         |          |          |       |          |          |          |          |         |         |         |         |
|-------------------------------|---------|---------|---------|----------|----------|-------|----------|----------|----------|----------|---------|---------|---------|---------|
| <b>TGF-beta RI / ALK-5</b>    | 198.81  | 37.41   | 28.89   | 40.51    | 47.96    | 1.26  | 1.08     | 91.85    | 56.65    | 38.43    | 17.07   | 10.54   | 1.05    | 151.70  |
| <b>TGF-beta RII</b>           | 27.69   | 47.47   | 30.65   | 15.12    | 2.73     | 1.26  | 1.08     | 35.49    | 32.09    | 5.12     | 78.05   | 96.14   | 6.67    | 77.83   |
| <b>TGF-beta RIIB</b>          | 71.09   | 16.09   | 12.56   | 16.21    | 11.84    | 1.26  | 1.08     | 54.57    | 22.06    | 5.55     | 187.51  | 142.95  | 1.05    | 188.19  |
| <b>TGF-beta RIII</b>          | 8.68    | 11.67   | 9.29    | 11.61    | 5.46     | 1.26  | 1.08     | 11.63    | 14.04    | 2.99     | 158.85  | 219.27  | 12.28   | 116.74  |
| <b>Thrombopoietin (TPO)</b>   | 19.43   | 11.67   | 12.31   | 11.07    | 40.98    | 1.26  | 69.74    | 16.70    | 49.13    | 16.65    | 78.36   | 99.09   | 12.63   | 56.85   |
| <b>Thrombospondin (TSP)</b>   | 776.23  | 665.33  | 879.47  | 330.05   | 179.41   | 58.95 | 277.53   | 410.94   | 1627.91  | 936.95   | 344.53  | 317.94  | 289.86  | 152.31  |
| <b>Thrombospondin-1</b>       | 21.49   | 13.68   | 79.38   | 29.71    | 17.00    | 4.21  | 66.13    | 25.05    | 51.14    | 32.03    | 5.49    | 7.59    | 1.05    | 3.65    |
| <b>Thrombospondin-2</b>       | 9746.67 | 9142.46 | 9825.17 | 11120.34 | 12527.55 | 7.16  | 12136.33 | 11511.19 | 18113.09 | 15229.89 | 1124.44 | 2857.64 | 1264.38 | 1401.82 |
| <b>Thrombospondin-4</b>       | 12.40   | 23.33   | 9.55    | 10.80    | 16.09    | 1.26  | 78.78    | 12.53    | 2849.22  | 16.23    | 10.06   | 5.48    | 1.05    | 11.25   |
| <b>Thymopoietin</b>           | 13.23   | 18.50   | 10.55   | 9.45     | 11.23    | 1.26  | 76.97    | 13.42    | 3.51     | 12.81    | 152.75  | 199.87  | 1.05    | 71.44   |
| <b>Tie-1</b>                  | 2.89    | 8.85    | 22.61   | 2.43     | 0.91     | 1.26  | 1.08     | 21.17    | 22.06    | 16.65    | 5.79    | 11.81   | 1.05    | 13.07   |
| <b>Tie-2</b>                  | 4.96    | 9.65    | 28.39   | 5.40     | 1.82     | 1.68  | 1.08     | 23.56    | 20.05    | 15.80    | 16.16   | 44.70   | 1.05    | 41.65   |
| <b>TIMP-1</b>                 | 16.53   | 6.84    | 16.08   | 12.69    | 17.61    | 1.26  | 10.48    | 27.44    | 64.68    | 31.17    | 18.90   | 47.23   | 1.05    | 42.56   |
| <b>TIMP-2</b>                 | 1.24    | 16.09   | 13.57   | 9.72     | 0.91     | 1.26  | 108.41   | 13.12    | 1.50     | 3.84     | 16.16   | 25.30   | 1.05    | 8.51    |
| <b>TIMP-3</b>                 | 3.31    | 27.35   | 15.83   | 10.53    | 2.43     | 1.68  | 130.82   | 17.00    | 9.53     | 5.12     | 2.13    | 5.90    | 1.05    | 11.25   |
| <b>TIMP-4</b>                 | 15.29   | 38.62   | 14.07   | 9.99     | 6.68     | 1.68  | 121.42   | 15.51    | 15.04    | 7.69     | 14.03   | 18.13   | 1.05    | 22.50   |
| <b>TL1A / TNFSF15</b>         | 15.29   | 1.21    | 1.26    | 2.16     | 0.91     | 1.26  | 1.08     | 18.79    | 1.50     | 2.56     | 14.03   | 10.54   | 6.67    | 16.72   |
| <b>TLR1</b>                   | 40.92   | 8.05    | 5.02    | 5.40     | 2.73     | 1.26  | 1.08     | 17.00    | 11.03    | 6.83     | 13.42   | 10.54   | 1.05    | 18.85   |
| <b>TLR2</b>                   | 29.76   | 8.45    | 5.53    | 4.05     | 5.77     | 1.26  | 10.12    | 17.89    | 15.54    | 8.11     | 10.06   | 4.64    | 4.91    | 9.73    |
| <b>TLR3</b>                   | 37.61   | 16.49   | 10.05   | 10.80    | 0.91     | 1.26  | 145.27   | 16.40    | 25.07    | 16.23    | 17.07   | 11.39   | 15.79   | 15.81   |
| <b>TLR4</b>                   | 13.23   | 12.87   | 11.05   | 11.07    | 4.55     | 2.11  | 168.76   | 11.63    | 22.06    | 15.37    | 3.96    | 1.27    | 1.05    | 7.30    |
| <b>TMEFF1 / Tomoregulin-1</b> | 157.89  | 33.79   | 30.65   | 132.61   | 166.05   | 2.11  | 431.48   | 602.10   | 549.99   | 228.47   | 309.16  | 207.46  | 1871.13 | 625.06  |
| <b>TMEFF2</b>                 | 92.59   | 2.82    | 18.09   | 22.69    | 0.91     | 1.26  | 1.08     | 20.58    | 19.05    | 4.70     | 159.46  | 188.06  | 1.05    | 166.90  |
| <b>TNF-alpha</b>              | 1.24    | 1.21    | 3.27    | 4.05     | 0.91     | 1.26  | 1.08     | 0.89     | 1.50     | 1.28     | 97.26   | 68.73   | 13.34   | 70.23   |
| <b>TNF-beta</b>               | 48.77   | 1.21    | 35.67   | 15.94    | 12.75    | 1.26  | 7.59     | 150.00   | 84.23    | 1.28     | 52.14   | 41.32   | 9.47    | 34.05   |
| <b>TNF RI / TNFRSF1A</b>      | 14.88   | 12.47   | 15.07   | 13.50    | 20.64    | 1.26  | 149.97   | 18.79    | 27.57    | 15.37    | 21.65   | 10.96   | 2.81    | 4.56    |
| <b>TNF RII / TNFRSF1B</b>     | 3311.17 | 2744.99 | 2371.89 | 1369.89  | 1465.65  | 1.26  | 1318.29  | 2165.36  | 4750.37  | 4446.45  | 289.65  | 589.07  | 323.90  | 266.32  |

|                                   |       |       |        |        |        |      |        |        |        |        |        |        |        |        |
|-----------------------------------|-------|-------|--------|--------|--------|------|--------|--------|--------|--------|--------|--------|--------|--------|
| <b>TRADD</b>                      | 20.25 | 19.31 | 22.36  | 19.45  | 20.64  | 1.26 | 130.09 | 10.44  | 179.49 | 73.03  | 11.28  | 7.17   | 1.05   | 2.43   |
| <b>TRAIL / TNFSF10</b>            | 2.48  | 2.01  | 9.55   | 0.81   | 0.91   | 1.26 | 1.08   | 6.56   | 4.51   | 2.99   | 21.34  | 20.66  | 1.05   | 19.15  |
| <b>TRAIL R1 / DR4 / TNFRSF10A</b> | 8.27  | 2.41  | 13.82  | 4.32   | 5.16   | 1.26 | 1.08   | 10.44  | 13.04  | 2.14   | 46.95  | 45.12  | 13.69  | 43.78  |
| <b>TRAIL R2 / DR5 / TNFRSF10B</b> | 15.71 | 1.21  | 14.57  | 7.83   | 17.61  | 1.26 | 8.67   | 14.91  | 5.51   | 1.28   | 41.16  | 38.79  | 5.97   | 54.11  |
| <b>TRAIL R3 / TNFRSF10C</b>       | 4.96  | 2.41  | 10.55  | 0.81   | 0.91   | 1.26 | 1.08   | 3.28   | 19.05  | 4.27   | 37.50  | 42.59  | 1.05   | 25.84  |
| <b>TRAIL R4 / TNFRSF10D</b>       | 6.61  | 2.41  | 12.56  | 2.43   | 1.52   | 1.26 | 2.89   | 7.46   | 21.56  | 2.56   | 48.48  | 45.54  | 2.81   | 40.13  |
| <b>TRANCE</b>                     | 18.60 | 1.21  | 17.08  | 5.67   | 16.09  | 1.26 | 9.76   | 12.82  | 142.89 | 1.28   | 19.51  | 10.96  | 10.53  | 9.73   |
| <b>TREM-1</b>                     | 14.47 | 7.64  | 21.35  | 6.48   | 6.98   | 2.11 | 1.08   | 34.29  | 18.05  | 14.95  | 6.71   | 1.27   | 20.70  | 6.99   |
| <b>TROY / TNFRSF19</b>            | 28.52 | 3.62  | 13.06  | 5.94   | 6.98   | 1.26 | 1.08   | 24.16  | 7.02   | 5.98   | 3.35   | 1.27   | 3.86   | 2.43   |
| <b>TSG-6</b>                      | 1.65  | 1.21  | 11.05  | 3.24   | 3.95   | 1.26 | 1.08   | 159.84 | 463.26 | 12.38  | 6.71   | 1.27   | 5.26   | 4.56   |
| <b>TSLP</b>                       | 1.24  | 1.21  | 10.05  | 3.51   | 0.91   | 1.26 | 1.08   | 17.59  | 16.54  | 1.28   | 0.91   | 1.27   | 1.05   | 0.91   |
| <b>TWEAK / TNFSF12</b>            | 16.95 | 6.03  | 10.55  | 4.86   | 7.89   | 2.95 | 1.08   | 28.93  | 17.05  | 3.42   | 7.62   | 1.27   | 11.93  | 6.08   |
| <b>TWEAK R / TNFRSF12</b>         | 59.52 | 2.41  | 9.29   | 9.18   | 11.23  | 1.26 | 110.22 | 26.54  | 11.53  | 5.98   | 0.91   | 1.27   | 1.05   | 0.91   |
| <b>Ubiquitin+1</b>                | 27.69 | 7.64  | 16.58  | 12.69  | 19.43  | 2.11 | 63.96  | 17.30  | 38.60  | 17.94  | 31.40  | 15.18  | 23.51  | 22.80  |
| <b>uPA</b>                        | 4.13  | 1.21  | 324.31 | 462.66 | 251.36 | 1.68 | 703.59 | 106.46 | 379.53 | 274.59 | 178.67 | 318.78 | 707.46 | 383.97 |
| <b>uPAR</b>                       | 1.24  | 1.21  | 18.34  | 4.05   | 0.91   | 1.26 | 1.08   | 7.16   | 21.56  | 5.98   | 16.77  | 1.27   | 1.05   | 13.07  |
| <b>Vasorin</b>                    | 1.24  | 1.21  | 19.85  | 7.29   | 4.86   | 1.26 | 1.08   | 6.86   | 146.90 | 8.11   | 21.34  | 1.27   | 34.39  | 24.63  |
| <b>VCAM-1 (CD106)</b>             | 1.24  | 1.21  | 13.31  | 5.40   | 2.13   | 1.26 | 1.08   | 12.82  | 22.56  | 6.41   | 10.37  | 1.27   | 1.05   | 9.73   |
| <b>VE-Cadherin</b>                | 7.03  | 16.49 | 12.56  | 1.08   | 0.91   | 1.26 | 1.08   | 4.47   | 15.04  | 3.84   | 44.51  | 21.51  | 14.04  | 25.84  |
| <b>VEGF</b>                       | 13.23 | 9.25  | 10.05  | 3.24   | 1.82   | 1.26 | 1.08   | 4.18   | 9.02   | 1.28   | 17.07  | 20.24  | 3.51   | 11.55  |
| <b>VEGF R2 (KDR)</b>              | 11.57 | 51.49 | 14.32  | 2.43   | 3.34   | 1.26 | 9.40   | 12.82  | 8.52   | 1.28   | 29.88  | 15.60  | 5.26   | 20.07  |
| <b>VEGF R3</b>                    | 13.64 | 2.82  | 10.80  | 0.81   | 0.91   | 1.26 | 1.08   | 5.96   | 7.52   | 4.70   | 14.94  | 7.59   | 1.05   | 3.04   |
| <b>VEGF-B</b>                     | 30.17 | 1.21  | 9.80   | 0.81   | 0.91   | 1.26 | 1.08   | 6.56   | 1.50   | 1.28   | 7.32   | 5.06   | 1.05   | 0.91   |
| <b>VEGF-C</b>                     | 16.95 | 1.21  | 10.05  | 3.51   | 5.16   | 1.26 | 1.08   | 8.05   | 2.01   | 1.28   | 9.15   | 7.17   | 1.05   | 1.52   |
| <b>VEGF-D</b>                     | 5.37  | 1.61  | 10.55  | 0.81   | 0.91   | 1.26 | 125.40 | 19.68  | 9.02   | 4.27   | 19.82  | 10.54  | 13.34  | 2.43   |
| <b>VEGI / TNFSF15</b>             | 9.09  | 2.01  | 11.56  | 2.43   | 1.82   | 1.26 | 115.64 | 19.98  | 9.53   | 1.28   | 14.03  | 10.54  | 1.05   | 3.95   |

|                      |        |        |        |        |        |      |         |       |         |        |       |       |      |       |
|----------------------|--------|--------|--------|--------|--------|------|---------|-------|---------|--------|-------|-------|------|-------|
| <b>WIF-1</b>         | 9.51   | 1.21   | 11.05  | 3.78   | 8.50   | 1.26 | 133.71  | 29.82 | 5.01    | 1.28   | 46.95 | 43.43 | 8.42 | 50.77 |
| <b>WISP-1 / CCN4</b> | 10.75  | 1.21   | 9.80   | 9.18   | 13.36  | 1.26 | 100.10  | 14.02 | 18.05   | 13.67  | 0.91  | 1.27  | 1.75 | 0.91  |
| <b>XEDAR</b>         | 317.44 | 177.80 | 206.74 | 257.66 | 242.55 | 1.26 | 1057.74 | 93.64 | 1233.34 | 170.39 | 1.52  | 1.27  | 1.05 | 0.91  |
